# Supplementary material
Source: PubMed Central journal article supplement (PMC4291397)
Supplement: AAC.04203-14_zac001153624so1.pdf [file AAC.04203-14_zac001153624so1.pdf]

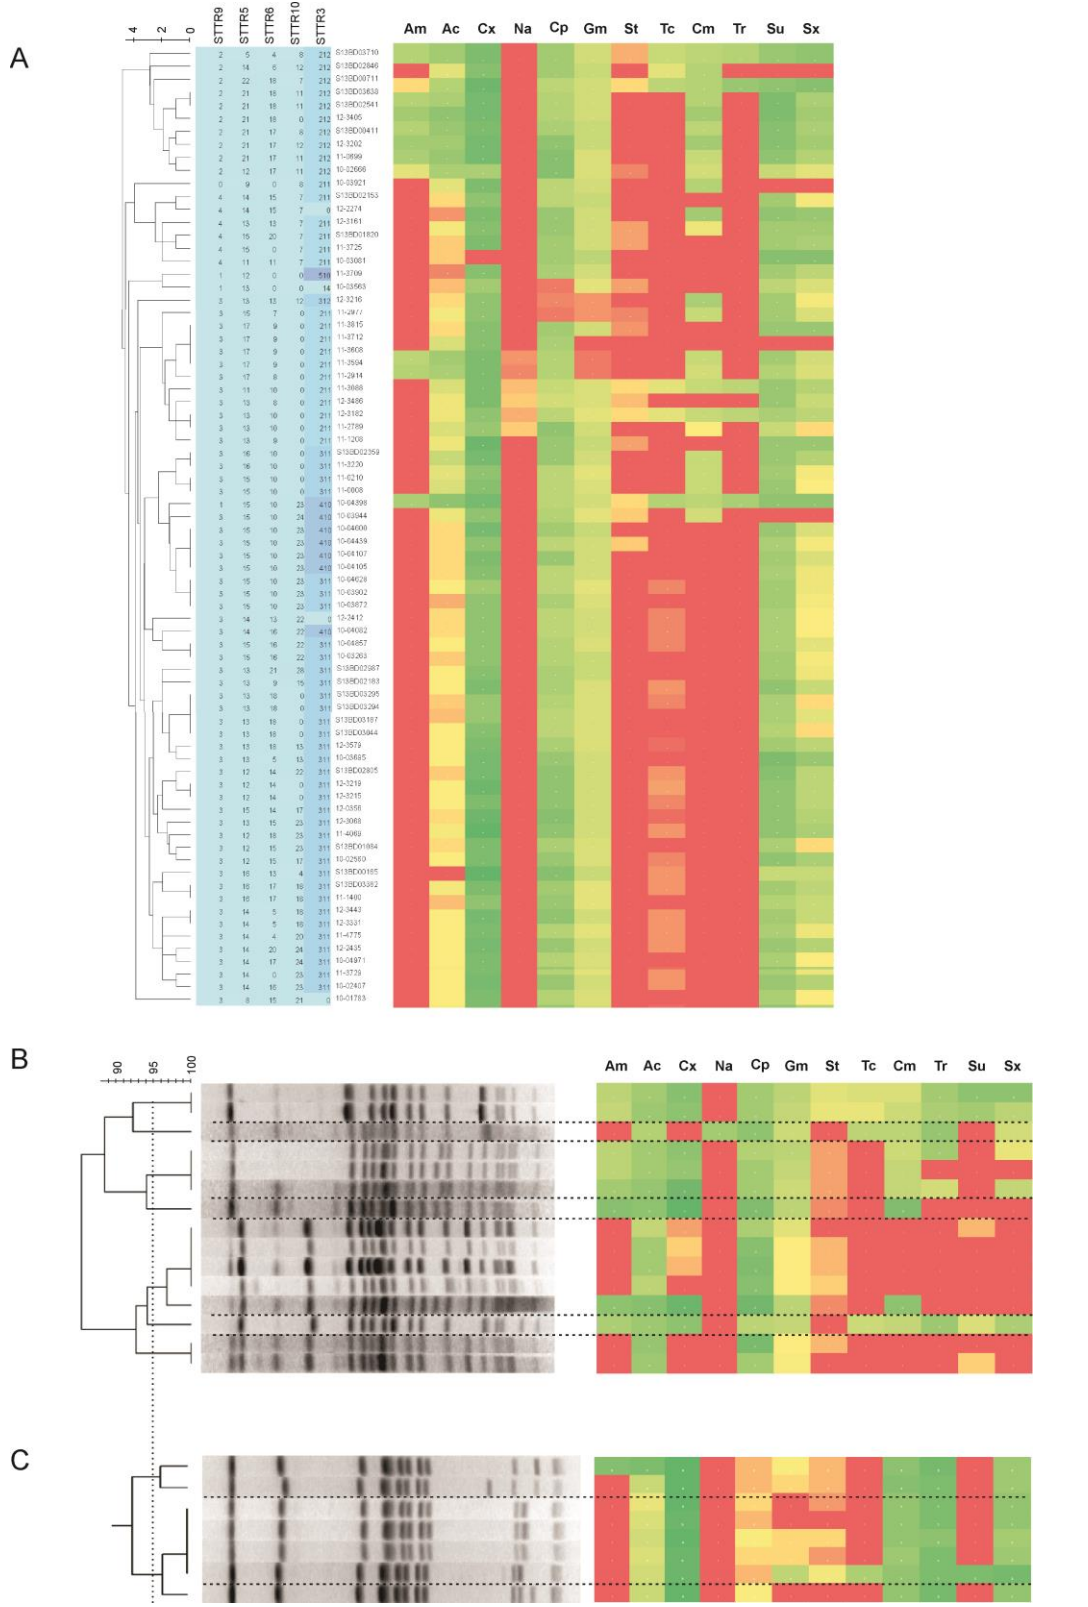

**Figure S1. Clonal relatedness of multi-drug resistant *S. enterica* isolates.** For three selected serotypes, resistance heat maps are compared to genotypic clustering by **(A)** 5-loci MLVA typing of *S. Typhimurium* isolates (SSTRs 3-5-6-9-10), or PFGE-XbaI typing of **(B)** *S. Infantis* and **(C)** *S. Kentucky* isolates.

**Table S1.** Selection criteria for drug susceptibility screenings.

| <b>Serovar</b>     | <b>Week</b> |       |                      |       |       |
|--------------------|-------------|-------|----------------------|-------|-------|
|                    | 1-24        | 25-29 | 30-41                | 42-47 | 48-52 |
| <b>Enteritidis</b> | 5           | 10    | 20                   | 10    | 5     |
| <b>Typhimurium</b> | 5           | 10    | 10                   | 5     | 5     |
| <b>Hadar</b>       |             |       | All isolated strains |       |       |
| <b>Infantis</b>    |             |       | All isolated strains |       |       |
| <b>Virchow</b>     |             |       | All isolated strains |       |       |
| <b>Brandenburg</b> |             |       | All isolated strains |       |       |
| <b>Derby</b>       |             |       | All isolated strains |       |       |
| <b>Typhi</b>       |             |       | All isolated strains |       |       |
| <b>Paratyphi</b>   |             |       | All isolated strains |       |       |
| <b>Dublin</b>      |             |       | All isolated strains |       |       |
| <b>Newport</b>     |             |       | All isolated strains |       |       |

**Table S2.** Breakpoints used in the interpretation of the antibiotic disk diffusion assays for all the *S. enterica* strains in this study (2009-2013).

| <b>Antibiotic</b>                  | <b>Disk content (µg)</b> | <b>Resistant (mm)</b> | <b>Intermediate resistant (mm)</b> | <b>Sensitive (mm)</b> |
|------------------------------------|--------------------------|-----------------------|------------------------------------|-----------------------|
| Ampicillin                         | 10                       | < 14                  |                                    | ≥14                   |
| Amoxicillin + Clavulanic acid      | 20/10                    | < 19                  |                                    | ≥19                   |
| Cefotaxime                         | 30                       | < 17                  | 17-19                              | ≥ 20                  |
| Nalidixic acid                     | 30                       | ≤ 13                  | 14-18                              | ≥ 19                  |
| Ciprofloxacin                      | 5                        | ≤ 15                  | 16-20                              | ≥ 21                  |
| Tetracycline                       | 30                       | ≤ 11                  | 12-14                              | ≥ 15                  |
| Chloramphenicol                    | 30                       | <17                   |                                    | ≥ 17                  |
| Gentamicin                         | 10                       | < 14                  | 14-16                              | ≥ 17                  |
| Trimethoprim                       | 5                        | < 10                  | 11-15                              | ≥ 16                  |
| Sulfonamides                       | 300                      | ≤ 12                  | 13-16                              | ≥ 17                  |
| Trimethoprim/<br>sulphamethoxazole | 1.25/23.75               | < 13                  | 13-15                              | ≥ 16                  |

**Table S3.** Absolute number of identified serotypes in human salmonellosis in Belgium, 2009-2013. The significance of variation of serotype prevalence during this period is calculated using the  $\chi^2$  score (four degrees of freedom); Significant varying serovars (after Bonferonni's correction) are indicated in green.

| SEROTYPE           |                       | YEAR OF ISOLATION |      |      |      |          | X <sup>2</sup> |
|--------------------|-----------------------|-------------------|------|------|------|----------|----------------|
|                    |                       | 2009              | 2010 | 2011 | 2012 | 2013     |                |
| O:4(B)             | TYPHIMURIUM           | 1392              | 1390 | 1473 | 1165 | 1341     | 3.89E-11       |
|                    | TYPHIMURIUM VAR. O:5- | 470               | 432  | 389  | 494  | 416      | 2.07E-06       |
|                    | DERBY                 | 42                | 25   | 31   | 34   | 46       | 7.26E-02       |
|                    | BRANDENBURG           | 8                 | 16   | 16   | 16   | 32       | 5.51E-03       |
|                    | STANLEY               | 6                 | 3    | 19   | 43   | 18       | 1.26E-12       |
|                    | AGONA                 | 8                 | 23   | 9    | 21   | 17       | 3.43E-02       |
|                    | PARATYPHI B VAR. L(+) | 69                | 41   | 14   | 8    | 16       |                |
|                    | TARTRATE+             |                   |      |      |      |          | 1.38E-18       |
|                    | SAINTPAUL             | 21                | 28   | 15   | 9    | 12       | 2.01E-02       |
|                    | STANLEYVILLE          | 5                 | 2    | 4    | 2    | 8        | 2.45E-01       |
|                    | BREDENEY              | 6                 | 4    | 1    | 11   | 6        | 3.40E-02       |
|                    | PARATYPHI B           | 4                 | 1    | 5    | 1    | 5        | 2.49E-01       |
|                    | CHESTER               | 1                 | 5    | 1    | 3    | 4        | 4.37E-01       |
|                    | SCHWARZENGRUND        | 5                 | 1    | 0    | 3    | 4        | 1.44E-01       |
|                    | HEIDELBERG            | 5                 | 6    | 2    | 8    | 4        | 3.73E-01       |
|                    | COELN                 | 1                 | 2    | 1    | 4    | 3        | 5.31E-01       |
|                    | SANDIEGO              | 1                 | 4    | 5    | 3    | 3        | 5.96E-01       |
|                    | INDIANA               | 5                 | 5    | 7    | 0    | 3        | 1.21E-01       |
|                    | READING               | 3                 | 4    | 0    | 2    | 2        | 4.58E-01       |
|                    | DUISBURG              | 0                 | 2    | 0    | 0    | 2        | 2.55E-01       |
|                    | ITURI                 | 0                 | 0    | 0    | 0    | 2        | 1.16E-01       |
|                    | ABONY                 | 1                 | 1    | 0    | 1    | 2        | 7.74E-01       |
|                    | ARECHAVALETA          | 0                 | 0    | 0    | 0    | 1        | 4.47E-01       |
|                    | TRACHAU               | 0                 | 0    | 0    | 0    | 1        | 4.47E-01       |
|                    | BRANCASTER            | 0                 | 0    | 1    | 1    | 1        | 7.21E-01       |
|                    | SHUBRA                | 0                 | 0    | 0    | 0    | 1        | 4.47E-01       |
|                    | BRADFORD              | 0                 | 1    | 0    | 0    | 1        | 6.15E-01       |
|                    | KINGSTON              | 2                 | 0    | 2    | 0    | 1        | 3.64E-01       |
|                    | KISANGANI             | 0                 | 0    | 0    | 0    | 1        | 4.47E-01       |
|                    | HAIFA                 | 2                 | 0    | 1    | 1    | 0        | 4.26E-01       |
|                    | KALAMU                | 2                 | 0    | 0    | 0    | 0        | 7.66E-02       |
|                    | SHUBRA                | 1                 | 0    | 0    | 0    | 0        | 3.77E-01       |
|                    | BOCHUM                | 1                 | 0    | 0    | 0    | 0        | 3.77E-01       |
|                    | WIEN                  | 1                 | 2    | 1    | 0    | 0        | 5.18E-01       |
| TUDU               | 0                     | 1                 | 0    | 0    | 0    | 4.59E-01 |                |
| BANANA             | 0                     | 0                 | 1    | 0    | 0    | 3.73E-01 |                |
| BISPEBJERG         | 0                     | 0                 | 1    | 0    | 0    | 3.73E-01 |                |
| LIMETE             | 0                     | 0                 | 0    | 2    | 0    | 7.31E-02 |                |
| EPPENDORF          | 0                     | 0                 | 0    | 1    | 0    | 3.69E-01 |                |
| LOUBORNO           | 0                     | 0                 | 0    | 1    | 0    | 3.69E-01 |                |
| KIAMBU             | 0                     | 0                 | 0    | 1    | 0    | 3.69E-01 |                |
| SUBSPI             |                       |                   |      |      |      |          |                |
| SUBSPI [I 4:i:-]   | -                     | 85                | 100  | 19   | 235  | 5.60E-57 |                |
| SUBSPI [I 4,5:b:-] | 1                     | 6                 | 6    | 18   | 10   | 3.16E-04 |                |

|  |                             |   |   |   |    |   |          |
|--|-----------------------------|---|---|---|----|---|----------|
|  | SUBSPI [I 4::-1,2]          | 0 | 0 | 5 | 1  | 5 | 1.65E-02 |
|  | SUBSPI [I 4::-]             | 1 | 1 | 2 | 4  | 4 | 4.22E-01 |
|  | SUBSPI [I 4,5::-1,2]        | 5 | 6 | 2 | 1  | 2 | 2.50E-01 |
|  | SUBSPI [I 4:d:-]            | 1 | 0 | 1 | 3  | 2 | 4.10E-01 |
|  | <b>SUBSPI [I 4:b:-]</b>     | 1 | 2 | 8 | 12 | 2 | 3.86E-04 |
|  | SUBSPI [I 4,5::-]           | 2 | 5 | 6 | 5  | 1 | 2.55E-01 |
|  | SUBSPI [I 4:i:-]            | 0 | 0 | 1 | 0  | 0 | 3.73E-01 |
|  | SUBSPI [I 4,5:e,h:-]        | 0 | 0 | 1 | 1  | 0 | 5.14E-01 |
|  | SUBSPI [I 4:r:-]            | 0 | 0 | 0 | 1  | 0 | 3.69E-01 |
|  | SUBSPI [I 4::-1,6]          | 3 | 0 | 0 | 0  | 0 | 1.30E-02 |
|  | <b>SUBSPII [II 4.5:b:-]</b> |   |   |   |    |   |          |
|  | SUBSPII [II 4.5:b:-]        | 0 | 0 | 0 | 0  | 1 | 4.47E-01 |

|             |                       |     |     |     |     |     |          |
|-------------|-----------------------|-----|-----|-----|-----|-----|----------|
| <b>0:9</b>  | <b>ENTERITIDIS</b>    | 587 | 823 | 481 | 663 | 671 | 8.99E-12 |
| <b>(D1)</b> | <b>TYPHI</b>          | 26  | 32  | 25  | 16  | 25  | 4.40E-01 |
|             | <b>DUBLIN</b>         | 8   | 12  | 16  | 14  | 23  | 1.16E-01 |
|             | <b>PANAMA</b>         | 4   | 8   | 10  | 19  | 10  | 9.70E-03 |
|             | <b>NAPOLI</b>         | 5   | 8   | 4   | 3   | 8   | 6.12E-01 |
|             | <b>DURBAN</b>         | 0   | 1   | 5   | 0   | 7   | 4.32E-03 |
|             | <b>EASTBOURNE</b>     | 2   | 0   | 3   | 1   | 2   | 4.73E-01 |
|             | <b>SAARBRUECKEN</b>   | 0   | 0   | 0   | 0   | 1   | 4.47E-01 |
|             | <b>MIAMI</b>          | 0   | 0   | 1   | 0   | 1   | 5.61E-01 |
|             | <b>NDOLO</b>          | 0   | 0   | 0   | 2   | 1   | 2.30E-01 |
|             | <b>KAPEMBA</b>        | 0   | 1   | 2   | 0   | 1   | 4.65E-01 |
|             | <b>GOETTINGEN</b>     | 0   | 0   | 0   | 0   | 1   | 4.47E-01 |
|             | <b>JAMAICA</b>        | 0   | 0   | 0   | 0   | 1   | 4.47E-01 |
|             | <b>BERTA</b>          | 5   | 4   | 0   | 0   | 1   | 2.74E-02 |
|             | <b>WANGATA</b>        | 1   | 0   | 0   | 0   | 0   | 3.77E-01 |
|             | <b>JAVIANA</b>        | 0   | 1   | 0   | 2   | 0   | 2.33E-01 |
|             | <b>OS</b>             | 0   | 1   | 0   | 0   | 0   | 4.59E-01 |
|             | <b>LOME</b>           | 0   | 0   | 0   | 1   | 0   | 3.69E-01 |
|             | <b>GALLINARUM</b>     | 0   | 0   | 0   | 1   | 0   | 3.69E-01 |
|             | <b>SENDAI</b>         | 0   | 1   | 0   | 0   | 0   | 4.59E-01 |
|             | <b>ITAMI</b>          | 0   | 1   | 1   | 0   | 0   | 5.68E-01 |
|             | <b>SUBSPI</b>         |     |     |     |     |     |          |
|             | SUBSPI [I 9::-1,5]    | 2   | 1   | 1   | 1   | 1   | 9.39E-01 |
|             | SUBSPI [I 9::-]       | 0   | 3   | 2   | 2   | 0   | 2.91E-01 |
|             | SUBSPI [I 9:l,v:-]    | 0   | 1   | 0   | 1   | 0   | 5.66E-01 |
|             | SUBSPI [I 9::-e,n,x]  | 0   | 0   | 1   | 1   | 0   | 5.14E-01 |
|             | SUBSPI [I 9:a:-]      | 0   | 0   | 1   | 0   | 0   | 3.73E-01 |
|             | SUBSPI [I 9:eh:e,n,x] | 0   | 0   | 1   | 0   | 0   | 3.73E-01 |

|             |                    |    |    |    |    |    |          |
|-------------|--------------------|----|----|----|----|----|----------|
| <b>0:7</b>  | <b>INFANTIS</b>    | 23 | 59 | 32 | 38 | 57 | 2.31E-03 |
| <b>(C1)</b> | <b>VIRCHOW</b>     | 18 | 24 | 14 | 13 | 19 | 6.20E-01 |
|             | <b>ORANIENBURG</b> | 7  | 11 | 17 | 5  | 19 | 2.08E-02 |
|             | <b>MONTEVIDEO</b>  | 8  | 5  | 13 | 8  | 17 | 7.44E-02 |
|             | <b>TENNESSEE</b>   | 7  | 20 | 12 | 4  | 12 | 2.78E-02 |
|             | <b>LIVINGSTONE</b> | 18 | 31 | 12 | 32 | 11 | 5.61E-04 |

|                |                         |    |    |    |    |    |          |
|----------------|-------------------------|----|----|----|----|----|----------|
|                | <b>BRAENDERUP</b>       | 13 | 16 | 8  | 21 | 10 | 7.49E-02 |
|                | <b>RISSEN</b>           | 13 | 21 | 17 | 6  | 9  | 4.16E-02 |
|                | <b>OHIO</b>             | 51 | 4  | 3  | 1  | 9  | 4.14E-29 |
|                | <b>THOMPSON</b>         | 5  | 4  | 8  | 17 | 8  | 6.17E-03 |
|                | <b>MBANDAKA</b>         | 11 | 15 | 1  | 11 | 6  | 1.40E-02 |
|                | <b>BAREILLY</b>         | 1  | 3  | 2  | 4  | 5  | 5.58E-01 |
|                | <b>MIKAWASIMA</b>       | 0  | 1  | 0  | 2  | 4  | 1.15E-01 |
|                | <b>ISANGI</b>           | 1  | 1  | 0  | 0  | 2  | 5.30E-01 |
|                | <b>SINGAPORE</b>        | 0  | 0  | 0  | 0  | 1  | 4.47E-01 |
|                | <b>MENSTON</b>          | 0  | 0  | 0  | 1  | 1  | 5.59E-01 |
|                | <b>POTSDAM</b>          | 2  | 3  | 1  | 0  | 1  | 5.01E-01 |
|                | <b>CONCORD</b>          | 7  | 5  | 4  | 4  | 0  | 1.36E-01 |
|                | <b>GALIERNA</b>         | 3  | 0  | 0  | 0  | 0  | 1.30E-02 |
|                | <b>KIVU</b>             | 1  | 2  | 0  | 0  | 0  | 2.97E-01 |
|                | <b>NIGERIA</b>          | 1  | 0  | 0  | 0  | 0  | 3.77E-01 |
|                | <b>LAROCHELLE</b>       | 1  | 2  | 1  | 0  | 0  | 5.18E-01 |
|                | <b>COLINDALE</b>        | 0  | 3  | 1  | 0  | 0  | 1.02E-01 |
|                | <b>HARTFORD</b>         | 0  | 2  | 0  | 0  | 0  | 1.23E-01 |
|                | <b>OSLO</b>             | 0  | 0  | 1  | 0  | 0  | 3.73E-01 |
|                | <b>ORITAMERIN</b>       | 0  | 0  | 1  | 0  | 0  | 3.73E-01 |
|                | <b>PAPUANA</b>          | 0  | 0  | 1  | 0  | 0  | 3.73E-01 |
|                | <b>OAKLAND</b>          | 0  | 0  | 1  | 0  | 0  | 3.73E-01 |
|                | <b>STRATHCONA</b>       | 0  | 0  | 1  | 0  | 0  | 3.73E-01 |
|                | <b>CHOLERAESUIS</b>     | 0  | 0  | 1  | 1  | 0  | 5.14E-01 |
|                | <b>RICHMOND</b>         | 0  | 0  | 0  | 1  | 0  | 3.69E-01 |
|                | <b>NGILI</b>            | 0  | 0  | 0  | 1  | 0  | 3.69E-01 |
|                | <b>GEORGIA</b>          | 0  | 0  | 0  | 1  | 0  | 3.69E-01 |
|                | <b>SUBSPI</b>           |    |    |    |    |    |          |
|                | SUBSPI [I 7::-]         | 0  | 3  | 1  | 2  | 4  | 3.64E-01 |
|                | SUBSPI [I 7:r:-]        | 2  | 3  | 12 | 3  | 2  | 1.10E-03 |
|                | SUBSPI [I 7:k:-]        | 0  | 1  | 0  | 0  | 0  | 4.59E-01 |
|                | SUBSPI [I 7::-1,5]      | 0  | 1  | 1  | 4  | 2  | 1.88E-01 |
|                | SUBSPI [I 7:d:-]        | 0  | 0  | 1  | 0  | 0  | 3.73E-01 |
|                | SUBSPI [I 6,7::-1,5]    | 1  | 0  | 0  | 0  | 1  | 5.64E-01 |
|                | SUBSPI [I6,7::-l,w]     | 0  | 1  | 0  | 0  | 0  | 4.59E-01 |
|                | SUBSPI [I 6,7:l,v:-]    | 0  | 1  | 0  | 0  | 0  | 4.59E-01 |
|                | SUBSPI [I 6,7:k:-]      | 0  | 1  | 0  | 0  | 0  | 4.59E-01 |
|                | SUBSPI [I 6,7:e,h:-]    | 0  | 0  | 0  | 1  | 0  | 3.69E-01 |
|                | SUBSPI [I 6,7:z4,z23:-] | 0  | 0  | 1  | 1  | 0  | 5.14E-01 |
|                | <b>SUBSPII</b>          |    |    |    |    |    |          |
|                | SUBSPII [II 6,7:m,t:-]  | 0  | 0  | 0  | 0  | 1  | 4.47E-01 |
| <b>0:8</b>     | <b>KENTUCKY</b>         | 23 | 50 | 35 | 37 | 65 | 1.27E-03 |
| <b>(C2-C3)</b> | <b>NEWPORT</b>          | 25 | 24 | 26 | 16 | 18 | 3.60E-01 |
|                | <b>BOVISMORBIFICANS</b> | 21 | 21 | 13 | 9  | 16 | 2.16E-01 |
|                | <b>MUENCHEN</b>         | 9  | 6  | 8  | 8  | 15 | 3.45E-01 |
|                | <b>CORVALLIS</b>        | 0  | 21 | 13 | 16 | 13 | 1.52E-03 |
|                | <b>HADAR</b>            | 12 | 13 | 7  | 15 | 12 | 5.62E-01 |

|                         |    |    |    |    |    |          |
|-------------------------|----|----|----|----|----|----------|
| LITCHFIELD              | 11 | 4  | 15 | 10 | 8  | 7.17E-02 |
| <b>MANHATTAN</b>        | 6  | 0  | 1  | 12 | 6  | 5.18E-04 |
| GOLDCOAST               | 3  | 3  | 6  | 5  | 6  | 7.03E-01 |
| KOTTBUS                 | 4  | 1  | 9  | 4  | 5  | 8.71E-02 |
| ALBANY                  | 3  | 3  | 1  | 1  | 4  | 6.38E-01 |
| BLOCKLEY                | 3  | 1  | 2  | 3  | 3  | 8.19E-01 |
| GLOSTRUP                | 1  | 0  | 1  | 0  | 2  | 5.05E-01 |
| BARDO                   | 1  | 0  | 0  | 0  | 2  | 2.86E-01 |
| EMEK                    | 1  | 0  | 0  | 0  | 1  | 5.64E-01 |
| HERSTON                 | 0  | 0  | 0  | 0  | 1  | 4.47E-01 |
| TAKORADI                | 1  | 1  | 0  | 2  | 1  | 7.11E-01 |
| ABA                     | 0  | 0  | 0  | 0  | 1  | 4.47E-01 |
| ALTONA                  | 1  | 2  | 0  | 1  | 1  | 7.83E-01 |
| HEISTOPDENBERG          | 2  | 0  | 0  | 0  | 0  | 7.66E-02 |
| YOVOKOME                | 2  | 0  | 0  | 0  | 0  | 7.66E-02 |
| PRADA                   | 1  | 0  | 0  | 0  | 0  | 3.77E-01 |
| SKANSEN                 | 1  | 0  | 0  | 0  | 0  | 3.77E-01 |
| APEYEME                 | 0  | 2  | 0  | 0  | 0  | 1.23E-01 |
| LEZENNES                | 0  | 2  | 0  | 0  | 0  | 1.23E-01 |
| REUBEUSS                | 0  | 1  | 0  | 0  | 0  | 4.59E-01 |
| GATUNI                  | 0  | 1  | 0  | 0  | 0  | 4.59E-01 |
| LINDENBURG              | 0  | 1  | 0  | 0  | 0  | 4.59E-01 |
| BELFAST                 | 0  | 1  | 0  | 0  | 0  | 4.59E-01 |
| BARDO                   | 0  | 0  | 2  | 0  | 0  | 7.47E-02 |
| PAKISTAN                | 0  | 0  | 1  | 1  | 0  | 5.14E-01 |
| BRUNEI                  | 0  | 0  | 1  | 0  | 0  | 3.73E-01 |
| FERRUCH                 | 0  | 0  | 1  | 0  | 0  | 3.73E-01 |
| BONARIENSIS             | 0  | 0  | 1  | 0  | 0  | 3.73E-01 |
| MANCHESTER              | 0  | 0  | 0  | 1  | 0  | 3.69E-01 |
| EBOOKO                  | 0  | 0  | 0  | 2  | 0  | 7.31E-02 |
| <b>SUBSPI</b>           |    |    |    |    |    |          |
| SUBSPI [I 6,8:-:-]      | 0  | 0  | 2  | 0  | 0  | 7.47E-02 |
| SUBSPI [I 6,8:z10:-]    | 0  | 0  | 0  | 1  | 0  | 3.69E-01 |
| SUBSPI [I 6,8:-:1,5]    | 1  | 1  | 0  | 2  | 3  | 4.82E-01 |
| SUBSPI [I 6,8:e,h:-]    | 0  | 0  | 1  | 1  | 0  | 5.14E-01 |
| SUBSPI [I 6,8,20:d:1,5] | 1  | 0  | 0  | 0  | 0  | 3.77E-01 |
| SUBSPI [I 8,20:i:-]     | 0  | 0  | 1  | 1  | 0  | 5.14E-01 |
| SUBSPI [I 8,20:-:]      | 0  | 2  | 1  | 1  | 0  | 5.16E-01 |
| SUBSPI [I 6,8:d:-]      | 1  | 1  | 1  | 0  | 0  | 7.30E-01 |
| <b>SUBSPII</b>          |    |    |    |    |    |          |
| SUBSPII [I II 6,8:a:-]  | 0  | 0  | 0  | 1  | 0  | 3.69E-01 |
| <b>0:13</b>             |    |    |    |    |    |          |
| <b>(G)</b>              |    |    |    |    |    |          |
| <b>POONA</b>            | 3  | 20 | 19 | 10 | 13 | 8.26E-03 |
| TELELKEBIR              | 2  | 1  | 4  | 4  | 3  | 5.77E-01 |
| IDIKAN                  | 0  | 0  | 0  | 2  | 0  | 7.31E-02 |
| OKATIE                  | 0  | 0  | 0  | 2  | 0  | 7.31E-02 |
| MISSISSIPPI             | 0  | 0  | 0  | 1  | 0  | 3.69E-01 |
| PUTTEN                  | 0  | 0  | 0  | 1  | 0  | 3.69E-01 |

|               |                          |   |   |   |    |    |          |
|---------------|--------------------------|---|---|---|----|----|----------|
|               | <b>AJIOBO</b>            | 0 | 0 | 1 | 2  | 2  | 4.01E-01 |
|               | <b>BRON</b>              | 0 | 0 | 0 | 0  | 1  | 4.47E-01 |
|               | <b>KINTAMBO</b>          | 0 | 0 | 0 | 0  | 2  | 1.16E-01 |
|               | <b>IDIKAN</b>            | 0 | 1 | 0 | 0  | 1  | 6.15E-01 |
|               | <b>ADJAME</b>            | 0 | 0 | 0 | 0  | 1  | 4.47E-01 |
|               | <b>KEDOUGOU</b>          | 2 | 2 | 0 | 1  | 1  | 6.94E-01 |
|               | <b>DURHAM</b>            | 2 | 1 | 3 | 2  | 0  | 4.42E-01 |
|               | <b>AGBENI</b>            | 1 | 1 | 0 | 0  | 0  | 5.71E-01 |
|               | <b>GRUMPENSIS</b>        | 1 | 0 | 0 | 0  | 0  | 3.77E-01 |
|               | <b>WORTHINGTON</b>       | 1 | 0 | 0 | 1  | 0  | 5.17E-01 |
|               | <b>HAVANA</b>            | 0 | 5 | 1 | 2  | 0  | 4.49E-02 |
|               | <b>CUBANA</b>            | 0 | 2 | 0 | 1  | 0  | 2.95E-01 |
|               | <b>SUBSPII</b>           |   |   |   |    |    |          |
|               | SUBSPII [II 13,23:-:-]   | 0 | 0 | 1 | 2  | 0  | 2.15E-01 |
|               | SUBSPII [II 13,23:g,m,t] | 0 | 1 | 0 | 0  | 1  | 6.15E-01 |
|               | SUBSPII [II 13,23:-      | 0 | 2 | 0 | 0  | 0  |          |
|               | :e,n,z15]                |   |   |   |    |    | 1.23E-01 |
|               | <b>SubspIIla</b>         |   |   |   |    |    |          |
|               | SubspIIla [IIla          | 0 | 0 | 0 | 1  | 1  |          |
|               | 13,23:z4,z23]            |   |   |   |    |    | 5.59E-01 |
| <b>0:28</b>   | <b>POMONA</b>            | 4 | 5 | 7 | 16 | 16 | 5.21E-03 |
| <b>(M)</b>    | <b>UMBILO</b>            | 1 | 0 | 2 | 0  | 3  | 2.46E-01 |
|               | <b>COTHAM</b>            | 1 | 1 | 2 | 7  | 2  | 2.98E-02 |
|               | <b>ANK</b>               | 0 | 0 | 0 | 0  | 2  | 1.16E-01 |
|               | <b>VITKIN</b>            | 2 | 3 | 0 | 0  | 1  | 2.67E-01 |
|               | <b>ONA</b>               | 0 | 0 | 0 | 0  | 1  | 4.47E-01 |
|               | <b>BABELSBERG</b>        | 1 | 0 | 0 | 0  | 0  | 3.77E-01 |
|               | <b>CHICAGO</b>           | 1 | 1 | 0 | 0  | 0  | 5.71E-01 |
|               | <b>FRIEDRISCHSFELDE</b>  | 1 | 0 | 0 | 0  | 0  | 3.77E-01 |
|               | <b>NIMA</b>              | 1 | 1 | 1 | 0  | 0  | 7.30E-01 |
|               | <b>AMOUTIVE</b>          | 0 | 1 | 0 | 0  | 0  | 4.59E-01 |
|               | <b>SOLNA</b>             | 0 | 1 | 0 | 0  | 0  | 4.59E-01 |
|               | <b>SUBSP</b>             |   |   |   |    |    |          |
|               | SUBSP [28:-:-]           | 0 | 0 | 1 | 0  | 0  | 3.73E-01 |
|               | SUBSP [28:z10:-]         | 0 | 1 | 0 | 0  | 0  | 4.59E-01 |
| <b>0:3,10</b> | <b>LONDON</b>            | 8 | 1 | 2 | 5  | 5  | 9.07E-02 |
| <b>(E1)</b>   | <b>WELTEVREDEN</b>       | 1 | 5 | 2 | 6  | 4  | 3.28E-01 |
|               | <b>ANATUM</b>            | 2 | 6 | 3 | 2  | 3  | 6.21E-01 |
|               | <b>GIVE</b>              | 2 | 3 | 2 | 2  | 3  | 9.93E-01 |
|               | <b>MUENSTER</b>          | 4 | 2 | 1 | 3  | 2  | 6.50E-01 |
|               | <b>CUCKMERE</b>          | 0 | 0 | 0 | 0  | 1  | 4.47E-01 |
|               | <b>UGANDA</b>            | 2 | 0 | 0 | 0  | 1  | 2.37E-01 |
|               | <b>GOELZAU</b>           | 0 | 0 | 0 | 0  | 1  | 4.47E-01 |
|               | <b>AMAGER</b>            | 0 | 1 | 0 | 0  | 1  | 6.15E-01 |
|               | <b>BUTANTAN</b>          | 1 | 0 | 0 | 0  | 1  | 5.64E-01 |
|               | <b>VELJE</b>             | 2 | 0 | 0 | 0  | 0  | 7.66E-02 |



|                |                          |   |    |   |    |   |          |
|----------------|--------------------------|---|----|---|----|---|----------|
|                | <b>AMSTERDAM</b>         | 1 | 0  | 1 | 1  | 0 | 6.89E-01 |
|                | <b>KALINA</b>            | 1 | 0  | 0 | 0  | 0 | 3.77E-01 |
|                | <b>NYBORG</b>            | 1 | 0  | 0 | 0  | 0 | 3.77E-01 |
|                | <b>ORION</b>             | 1 | 1  | 0 | 0  | 0 | 5.71E-01 |
|                | <b>REGENT</b>            | 1 | 0  | 0 | 0  | 0 | 3.77E-01 |
|                | <b>ZANZIBAR</b>          | 1 | 0  | 0 | 0  | 0 | 3.77E-01 |
|                | <b>OXFORD</b>            | 0 | 2  | 0 | 1  | 0 | 2.95E-01 |
|                | <b>NCHANGA</b>           | 0 | 1  | 0 | 0  | 0 | 4.59E-01 |
|                | <b>MELEAGRIDIS</b>       | 0 | 0  | 2 | 0  | 0 | 7.47E-02 |
|                | <b>SUBSP</b>             |   |    |   |    |   |          |
|                | SUBSP [3,10:l,z13:-]     | 1 | 0  | 0 | 0  | 0 | 3.77E-01 |
| <b>0:35</b>    | <b>EBRIE</b>             | 0 | 0  | 1 | 0  | 6 | 1.27E-03 |
| <b>(O)</b>     | <b>MONSCHAUI</b>         | 2 | 4  | 2 | 1  | 4 | 7.15E-01 |
|                | <b>ADELAIDE</b>          | 1 | 1  | 6 | 0  | 1 | 8.57E-03 |
|                | <b>EALING</b>            | 0 | 1  | 0 | 1  | 0 | 5.66E-01 |
|                | <b>ANECHO</b>            | 0 | 0  | 0 | 1  | 0 | 3.69E-01 |
| <b>0:1,3,</b>  | <b>SENFENBERG</b>        | 8 | 16 | 6 | 4  | 8 | 9.81E-02 |
| <b>19</b>      | <b>CARNO</b>             | 0 | 0  | 0 | 2  | 0 | 7.31E-02 |
| <b>(E4)</b>    | <b>FAREHAM</b>           | 0 | 0  | 0 | 1  | 0 | 3.69E-01 |
|                | <b>RIDEAU</b>            | 0 | 0  | 0 | 1  | 0 | 3.69E-01 |
|                | <b>LIVERPOOL</b>         | 0 | 0  | 0 | 1  | 0 | 3.69E-01 |
|                | <b>CANNSTATT</b>         | 0 | 0  | 0 | 1  | 0 | 3.69E-01 |
|                | <b>SUBSPI</b>            |   |    |   |    |   |          |
|                | SUBSPI [I 3,19:l,z13:-]  | 0 | 0  | 0 | 0  | 1 | 4.47E-01 |
|                | SUBSPI [I 3,19:--]       | 0 | 0  | 1 | 0  | 1 | 5.61E-01 |
|                | SUBSPI [I 3,19:d:-]      | 0 | 0  | 0 | 1  | 0 | 3.69E-01 |
|                | SUBSPI [I 3,19:b:-]      | 0 | 0  | 1 | 0  | 0 | 3.73E-01 |
|                | <b>WINTERTHUR</b>        | 0 | 0  | 0 | 0  | 1 | 4.47E-01 |
|                | <b>LLANDOFF</b>          | 1 | 0  | 0 | 1  | 0 | 5.17E-01 |
|                | <b>VILVOORDE</b>         | 1 | 0  | 0 | 0  | 0 | 3.77E-01 |
| <b>0:30</b>    | <b>URBANA</b>            | 2 | 5  | 6 | 1  | 8 | 1.51E-01 |
| <b>(N)</b>     | <b>AGO</b>               | 0 | 0  | 0 | 2  | 1 | 2.30E-01 |
|                | <b>SUBSPII</b>           |   |    |   |    |   |          |
|                | SUBSPII [II 30:l,z28:z6] | 0 | 0  | 1 | 0  | 1 | 5.61E-01 |
|                | SUBSPII [II 30:--]       | 0 | 2  | 4 | 1  | 0 | 7.78E-02 |
| <b>0:2 (A)</b> | <b>PARATYPHI A</b>       | 5 | 6  | 6 | 12 | 6 | 2.44E-01 |
|                | <b>NITRA</b>             | 0 | 0  | 0 | 0  | 1 | 4.47E-01 |
| <b>0:16</b>    | <b>HULL</b>              | 0 | 0  | 0 | 0  | 2 | 1.16E-01 |
| <b>(I)</b>     | <b>SANGERA</b>           | 0 | 3  | 0 | 0  | 1 | 1.08E-01 |
|                | <b>MALSTATT</b>          | 0 | 0  | 0 | 0  | 1 | 4.47E-01 |
|                | <b>SZENTES</b>           | 0 | 0  | 0 | 1  | 1 | 5.59E-01 |
|                | <b>GAMINARA</b>          | 0 | 2  | 1 | 0  | 1 | 5.39E-01 |
|                | <b>HVITTINGFOSS</b>      | 0 | 0  | 0 | 4  | 1 | 1.21E-02 |

|                     |                                      |   |    |   |    |   |          |
|---------------------|--------------------------------------|---|----|---|----|---|----------|
|                     | <b>TEES</b>                          | 1 | 0  | 0 | 0  | 0 | 3.77E-01 |
|                     | <b>NOTTINGHAM</b>                    | 0 | 1  | 0 | 0  | 0 | 3.69E-01 |
|                     | <b>WISBERCH</b>                      | 0 | 0  | 0 | 1  | 0 | 4.59E-01 |
|                     | <b>GLASGOW</b>                       | 0 | 0  | 0 | 1  | 0 | 3.69E-01 |
|                     | <b>SAPHRA</b>                        | 0 | 0  | 1 | 0  | 0 | 3.69E-01 |
|                     | <b>SUBSPI</b>                        |   |    |   |    |   |          |
|                     | SUBSPI [I 16:l,v:-]                  | 0 | 0  | 0 | 1  | 0 | 3.73E-01 |
|                     | SUBSPI [I 16:b:-]                    | 0 | 0  | 0 | 1  | 0 | 3.69E-01 |
|                     | <b>SUBSPIIIb</b>                     |   |    |   |    |   |          |
|                     | SUBSPIIIb [IIIb<br>16:z10:e,n,x,z15] | 0 | 1  | 0 | 0  | 0 | 3.69E-01 |
|                     | <b>SubspIV</b>                       |   |    |   |    |   |          |
|                     | SubspIV [IV 16:z4,z32]               | 0 | 0  | 0 | 1  | 0 | 4.59E-01 |
| <b>O:11<br/>(F)</b> | <b>RUBISLAW</b>                      | 1 | 1  | 1 | 2  | 2 | 9.30E-01 |
|                     | <b>ABAETETUBA</b>                    | 0 | 1  | 0 | 1  | 1 | 7.60E-01 |
|                     | <b>SUBSPI</b>                        |   |    |   |    |   |          |
|                     | SUBSPI [I 11:i:-]                    | 0 | 0  | 0 | 0  | 1 | 4.47E-01 |
|                     | SUBSPI [I 11:k:-]                    | 0 | 0  | 1 | 0  | 0 | 3.73E-01 |
|                     | SUBSPI [I 11:-:e,n,x]                | 1 | 0  | 0 | 0  | 0 | 3.77E-01 |
|                     | <b>SUBSPIIIa</b>                     |   |    |   |    |   |          |
|                     | SUBSPIIIa [IIIa 11:z4,z23]           | 0 | 0  | 0 | 1  | 0 | 3.69E-01 |
|                     | <b>SubspIV</b>                       |   |    |   |    |   |          |
|                     | SubspIV [IV 11:g,z51]                | 0 | 1  | 0 | 0  | 0 | 4.59E-01 |
|                     | SubspIV [IV 11:z4,z23:-]             | 0 | 0  | 0 | 1  | 0 | 3.69E-01 |
|                     | <b>SENEGAL</b>                       | 1 | 0  | 0 | 0  | 0 | 3.77E-01 |
|                     | <b>KISARAWA</b>                      | 0 | 0  | 1 | 0  | 1 | 5.61E-01 |
|                     | <b>MARSEILLE</b>                     | 0 | 0  | 0 | 0  | 1 | 4.47E-01 |
|                     | <b>ABERDEEN</b>                      | 0 | 4  | 0 | 1  | 0 | 2.83E-02 |
|                     | <b>LEEWARDEN</b>                     | 0 | 1  | 0 | 0  | 0 | 4.59E-01 |
|                     | <b>VENEZIANA</b>                     | 0 | 0  | 2 | 1  | 0 | 2.17E-01 |
|                     | <b>WOHLEN</b>                        | 0 | 0  | 0 | 1  | 0 | 3.69E-01 |
| <b>O:17<br/>(J)</b> | <b>CARMEL</b>                        | 3 | 10 | 6 | 11 | 6 | 2.10E-01 |
|                     | <b>MATADI</b>                        | 0 | 0  | 2 | 1  | 0 | 2.17E-01 |
| <b>O:45<br/>(W)</b> | <b>SUELLDORF</b>                     | 0 | 0  | 0 | 2  | 1 | 2.30E-01 |
|                     | <b>APAPA</b>                         | 1 | 4  | 1 | 0  | 1 | 2.20E-01 |
|                     | <b>JODHPUR</b>                       | 0 | 0  | 0 | 1  | 0 | 3.69E-01 |
|                     | <b>DUGBE</b>                         | 0 | 0  | 1 | 0  | 0 | 3.73E-01 |
|                     | <b>SUBSPI</b>                        |   |    |   |    |   |          |
|                     | SUBSPI [I 45:r:-]                    | 0 | 0  | 0 | 0  | 1 | 4.47E-01 |
|                     | SUBSPI [I 45:b:-]                    | 2 | 0  | 0 | 0  | 0 | 7.66E-02 |
|                     | SUBSPI [I 45:z:-]                    | 0 | 0  | 1 | 0  | 0 | 3.73E-01 |
|                     | SUBSPI [I 45:-:]                     | 0 | 0  | 0 | 0  | 1 | 4.47E-01 |
|                     | <b>SubspIV</b>                       |   |    |   |    |   |          |
|                     | SubspIV [IV 45:g,z51:-]              | 0 | 1  | 0 | 1  | 0 | 5.66E-01 |

|                         |                                     |   |   |   |   |          |          |
|-------------------------|-------------------------------------|---|---|---|---|----------|----------|
| <b>O:44<br/>(V)</b>     | <b>KUA</b>                          | 0 | 0 | 1 | 0 | 1        | 5.61E-01 |
|                         | <b>SubspIV</b>                      |   |   |   |   |          |          |
|                         | SubspIV [IV 44:z4,z23]              | 2 | 2 | 1 | 0 | 3        | 5.79E-01 |
|                         | SubspIV [IV 44:z4,z32:-]            | 1 | 0 | 0 | 0 | 0        | 3.77E-01 |
|                         | <b>SubspIIIa</b>                    |   |   |   |   |          |          |
|                         | SubspIIIa [IIIa 44:z4,-]            | 0 | 2 | 0 | 0 | 0        | 1.23E-01 |
| <b>O:50<br/>(Z)</b>     | <b>SubspII</b>                      |   |   |   |   |          |          |
|                         | SubspII [II 50:b:Z6]                | 0 | 0 | 1 | 0 | 0        | 3.73E-01 |
|                         | <b>SubspIIIb</b>                    |   |   |   |   |          |          |
|                         | SubspIIIb [IIIb 50:-:-]             | 0 | 0 | 1 | 0 | 0        | 3.73E-01 |
|                         | SubspIIIb [IIIb<br>50:lv:e,n,x,z15] | 0 | 0 | 0 | 0 | 2        | 1.16E-01 |
|                         | SubspIIIb [IIIb 50:k:z]             | 0 | 0 | 1 | 3 | 2        | 2.04E-01 |
|                         | SubspIIIb [IIIb 50:z52:z35]         | 1 | 0 | 0 | 0 | 0        | 3.77E-01 |
|                         | <b>SubspIV</b>                      |   |   |   |   |          |          |
|                         | SubspIV [IV 50:g,z51:-]             | 0 | 2 | 0 | 2 | 0        | 2.06E-01 |
| <b>O:21<br/>(L)</b>     | <b>MINNESOTA</b>                    | 2 | 1 | 3 | 3 | 3        | 8.17E-01 |
|                         | <b>SubspII</b>                      |   |   |   |   |          |          |
|                         | SubspII [II 21:g,t]                 | 2 | 0 | 3 | 1 | 0        | 1.82E-01 |
| <b>O:9,46<br/>(D2)</b>  | <b>BENIN</b>                        | 0 | 0 | 0 | 0 | 1        | 4.47E-01 |
|                         | <b>TORONTO</b>                      | 0 | 0 | 0 | 0 | 1        | 4.47E-01 |
|                         | <b>SUBSPI</b>                       |   |   |   |   |          |          |
|                         | SUBSPI [I 9,46:-:e,n,x]             | 0 | 0 | 0 | 0 | 1        | 4.47E-01 |
| <b>O:40<br/>(R)</b>     | <b>JOHANNESBURG</b>                 | 0 | 1 | 1 | 1 | 1        | 9.15E-01 |
|                         | <b>DUVAL</b>                        | 0 | 0 | 0 | 1 | 0        | 3.69E-01 |
|                         | <b>OMIFISAN</b>                     | 0 | 1 | 0 | 0 | 0        | 4.59E-01 |
|                         | <b>TILENE</b>                       | 0 | 0 | 1 | 0 | 0        | 3.73E-01 |
|                         | <b>SUBSPI</b>                       |   |   |   |   |          |          |
|                         | SUBSPI [I 40:eh:-]                  | 0 | 0 | 0 | 0 | 1        | 4.47E-01 |
|                         | SUBSPI [I 40:-:-]                   | 0 | 0 | 1 | 0 | 0        | 3.73E-01 |
|                         | <b>SubspII</b>                      |   |   |   |   |          |          |
|                         | SubspII [II 40:-:1,5]               | 0 | 0 | 0 | 1 | 0        | 3.69E-01 |
| SubspII [II 40:z39:1,7] | 0                                   | 0 | 0 | 1 | 0 | 3.69E-01 |          |
|                         | <b>SubspIV</b>                      |   |   |   |   |          |          |
|                         | SubspIV [IV 40:z4,z24:-]            | 0 | 0 | 0 | 1 | 1        | 5.59E-01 |
| <b>O:41<br/>(S)</b>     | <b>WAYCROSS</b>                     | 0 | 2 | 2 | 0 | 0        | 2.08E-01 |
|                         | <b>SubspIIIa</b>                    |   |   |   |   |          |          |
|                         | SubspIIIa [IIIa 41:z4,z23]          | 2 | 1 | 3 | 0 | 2        | 4.85E-01 |
|                         | <b>SubspII</b>                      |   |   |   |   |          |          |
|                         | SubspII [II 41:-:-]                 | 0 | 0 | 1 | 0 | 0        | 3.73E-01 |

|                           |                             |   |   |   |   |          |          |
|---------------------------|-----------------------------|---|---|---|---|----------|----------|
| <b>O:42<br/>(T)</b>       | <b>TOMEGBE</b>              | 0 | 0 | 0 | 0 | 1        | 4.47E-01 |
|                           | <b>KANESHIE</b>             | 2 | 0 | 0 | 0 | 0        | 7.66E-02 |
|                           | <b>FREDERIKSBERG</b>        | 1 | 0 | 0 | 0 | 0        | 3.77E-01 |
|                           | <b>SUBSPI</b>               |   |   |   |   |          |          |
|                           | SUBSPI [I 42:-:-]           | 0 | 0 | 1 | 2 | 1        | 4.38E-01 |
|                           | <b>SubspIIIb</b>            |   |   |   |   |          |          |
|                           | SubspIIIb [IIIb 42:k:-]     | 0 | 0 | 1 | 0 | 0        | 3.73E-01 |
| <b>O:38<br/>(P)</b>       | <b>INVERNESS</b>            | 0 | 0 | 1 | 0 | 0        | 3.73E-01 |
|                           | <b>SHEFFIELD</b>            | 0 | 0 | 0 | 1 | 0        | 3.69E-01 |
|                           | <b>LANSING</b>              | 0 | 0 | 1 | 0 | 0        | 3.73E-01 |
|                           | <b>KASENYI</b>              | 0 | 0 | 0 | 0 | 1        | 4.47E-01 |
|                           | <b>SubspIIIb</b>            |   |   |   |   |          |          |
|                           | SubspIIIb [IIIb 38:r:1,5,7] | 0 | 0 | 0 | 1 | 0        | 3.69E-01 |
|                           | <b>SubspIV</b>              |   |   |   |   |          |          |
| SubspIV [IV 38:z4,z23]    | 0                           | 0 | 0 | 0 | 1 | 4.47E-01 |          |
| <b>O:51</b>               | <b>OVERSCHIE</b>            | 0 | 0 | 0 | 0 | 1        | 4.47E-01 |
| <b>O:60</b>               | <b>SubspIIIb</b>            |   |   |   |   |          |          |
|                           | SubspIIIb [IIIb 60:-:-]     | 0 | 0 | 0 | 1 | 0        | 3.69E-01 |
|                           | <b>SubspV</b>               |   |   |   |   |          |          |
|                           | SubspV [V 60:z41]           | 0 | 0 | 0 | 0 | 1        | 4.47E-01 |
| <b>O:43<br/>(U)</b>       | <b>KINGABWA</b>             | 0 | 1 | 0 | 0 | 0        | 4.59E-01 |
|                           | <b>MBAO</b>                 | 0 | 1 | 1 | 0 | 0        | 5.68E-01 |
|                           | <b>SubspIV</b>              |   |   |   |   |          |          |
|                           | SubspIV [IV 43:z4,z32]      | 0 | 0 | 0 | 0 | 1        | 4.47E-01 |
| <b>O:39<br/>(Q)</b>       | <b>WANDSWORTH</b>           | 0 | 0 | 1 | 0 | 0        | 3.73E-01 |
|                           | <b>SUBSPI</b>               |   |   |   |   |          |          |
|                           | SUBSPI [I 39:-:-]           | 0 | 1 | 1 | 2 | 1        | 7.10E-01 |
| <b>O:58</b>               | <b>SUBSPII</b>              |   |   |   |   |          |          |
|                           | SUBSPII [II 58:c:z6]        | 0 | 0 | 0 | 1 | 0        | 3.69E-01 |
|                           | SUBSPII [II                 | 1 | 1 | 1 | 0 | 1        |          |
|                           | 58:l,z13,z28:z6]            |   |   |   |   |          | 9.17E-01 |
|                           | <b>SubspIIIb</b>            |   |   |   |   |          |          |
|                           | SubspIIIb [IIIb 58:z52:z35] | 1 | 0 | 0 | 0 | 0        | 3.77E-01 |
| <b>O:48<br/>(Y)</b>       | <b>SubspIIIb</b>            |   |   |   |   |          |          |
|                           | SubspIIIb [IIIb 48:k:z53]   | 1 | 0 | 0 | 0 | 0        | 3.77E-01 |
|                           | SubspIIIb [IIIb 48:-:z53]   | 0 | 1 | 0 | 0 | 0        | 4.59E-01 |
|                           | SubspIIIb [III b 48:i:z]    | 1 | 1 | 2 | 0 | 0        | 4.46E-01 |
|                           | SubspIIIb [IIIb 48:i:z61]   | 0 | 0 | 2 | 0 | 0        | 7.47E-02 |
|                           | SubspIIIb [IIIb 48:i:-]     | 0 | 0 | 1 | 0 | 0        | 3.73E-01 |
|                           | SubspIIIb [IIIb 48:z:-]     | 0 | 0 | 1 | 0 | 0        | 3.73E-01 |
| SubspIIIb [IIIb 48:z52:z] | 0                           | 0 | 1 | 0 | 0 | 3.73E-01 |          |

|                         |                                      |   |   |   |   |   |          |
|-------------------------|--------------------------------------|---|---|---|---|---|----------|
|                         | <b>SubspIV</b>                       |   |   |   |   |   |          |
|                         | SubspIV [IV 48:g,z51:-]              | 1 | 1 | 0 | 0 | 1 | 7.63E-01 |
|                         | SubspIV [IV 48:Z4,Z32:-]             | 0 | 0 | 1 | 0 | 0 | 3.73E-01 |
| <b>O:6,14<br/>(H)</b>   | <b>SUNDSVALL</b>                     | 1 | 0 | 0 | 0 | 1 | 5.64E-01 |
|                         | <b>BLIJDORP</b>                      | 1 | 1 | 0 | 0 | 0 | 5.71E-01 |
|                         | <b>BOUSSO</b>                        | 1 | 0 | 0 | 0 | 0 | 3.77E-01 |
|                         | <b>FLORIDA</b>                       | 1 | 0 | 0 | 0 | 0 | 3.77E-01 |
|                         | <b>CARACAS</b>                       | 0 | 0 | 0 | 1 | 0 | 3.69E-01 |
| <b>O:40<br/>(R)</b>     | <b>TILENE</b>                        | 1 | 0 | 0 | 0 | 0 | 3.77E-01 |
| <b>O:65</b>             | <b>SUBSPIIIb</b>                     |   |   |   |   |   |          |
|                         | SubspIIIb [IIIb<br>65:z10:e,n,x,z15] | 1 | 0 | 0 | 0 | 0 | 3.77E-01 |
|                         | SubspIIIb [IIIb 65:z10:z]            | 0 | 1 | 0 | 0 | 0 | 4.59E-01 |
| <b>O:18<br/>(K)</b>     | <b>CERRO</b>                         | 3 | 0 | 0 | 1 | 0 | 5.94E-02 |
|                         | <b>SUBSPI</b>                        |   |   |   |   |   |          |
|                         | SubspI [18:-:-]                      | 0 | 0 | 0 | 1 | 0 | 3.69E-01 |
| <b>O:47<br/>(X)</b>     | <b>MOPUALINE</b>                     | 0 | 0 | 0 | 1 | 0 | 3.69E-01 |
|                         | <b>TAMBERMA</b>                      | 0 | 0 | 0 | 2 | 0 | 7.31E-02 |
|                         | <b>MOUNTPLEASANT</b>                 | 1 | 0 | 0 | 0 | 0 | 3.77E-01 |
|                         | <b>SubspIIIb</b>                     |   |   |   |   |   |          |
|                         | SubspIIIb [IIIb 47:-:-]              | 0 | 1 | 0 | 0 | 0 | 4.59E-01 |
|                         | SubspIIIb [IIIb 47:k:z35]            | 0 | 1 | 2 | 1 | 0 | 4.44E-01 |
| <b>O:30<br/>(N)</b>     | <b>URBANA</b>                        | 1 | 0 | 0 | 0 | 0 | 3.77E-01 |
| <b>O:53</b>             | <b>SubspIIIb</b>                     |   |   |   |   |   |          |
|                         | SubspIIIb [IIIb 53:z10:z35]          | 1 | 0 | 0 | 0 | 0 | 3.77E-01 |
|                         | SubspIIIb<br>[IIIb:53:lv:e,n,x,z15]  | 1 | 0 | 0 | 0 | 0 | 3.77E-01 |
| <b>O:9, 46<br/>(D2)</b> | <b>PLYMOUTH</b>                      | 0 | 1 | 0 | 0 | 0 | 4.59E-01 |
|                         | <b>BAILDON</b>                       | 0 | 0 | 0 | 3 | 0 | 4.59E-01 |
|                         | <b>SubspIIIb</b>                     |   |   |   |   |   |          |
|                         | SubspIIIb [IIIb 48:-:-]              | 0 | 0 | 0 | 1 | 0 | 1.21E-02 |
|                         | SubspIIIb [III b 48:i:z]             | 0 | 0 | 0 | 1 | 0 | 3.69E-01 |
|                         | <b>SubspIIIa</b>                     |   |   |   |   |   |          |
|                         | SubspIIIa [IIIa<br>56:z4,z23,z32]    | 0 | 0 | 0 | 1 | 0 | 3.69E-01 |
| <b>O:61</b>             | <b>SubspIIIb</b>                     |   |   |   |   |   |          |
|                         | SubspIIIb [IIIb 61:-:1,5,7]          | 0 | 1 | 0 | 0 | 0 | 3.69E-01 |
|                         | SubspIIIb [IIIb 61:i:Z53]            | 0 | 1 | 1 | 1 | 0 | 4.59E-01 |

**NOT CLASSIFIED**

20

19

11

8

10

---

**Table S4.** Characterization of Quinolone-resistant Salmonella isolates. Wild-type alleles are indicated with '/'. Empty slots, not performed.

| Id         | Serovar     | Nal <sup>a</sup> | Cip <sup>a</sup> | E-test<br>NAL | E-test<br>CIP | gyrA <sup>b</sup>     | gyrB <sup>b</sup> | parC <sup>b</sup> | QnrA | QnrB  | QnrC | QnrD | QnrS  | AAC |
|------------|-------------|------------------|------------------|---------------|---------------|-----------------------|-------------------|-------------------|------|-------|------|------|-------|-----|
| 11-2885    | Agona       | 7                | 16               |               |               |                       |                   |                   |      |       |      |      |       |     |
| 10-04452   | Brandenburg | 13               | 22               | 32            | 0.38          |                       |                   |                   | x    | x     | x    | x    | QnrS1 | x   |
| 11-2645    | Brandenburg | 12               | 21               | >256          | 0.5           | /                     | /                 | The57-Ser         | x    | x     | x    | x    | QnrS1 | x   |
| 11-3795    | Derby       | 7                | 25               | 6             | 0.012         | Asp87-Tyr             | /                 | The57-Ser         | x    | x     | x    | x    | x     | x   |
| 11-4163    | Derby       | 7                | 24               | >256          | 0.19          | Ser83-Phe             | /                 | The57-Ser         | x    | x     | x    | x    | x     | x   |
| 11-0146    | Derby       | 10               | 24               | 48            | 0.38          | /                     | /                 | The57-Ser         | x    | QnrB5 | x    | x    | x     | x   |
| 09-01274   | Derby       | 7                | 28               |               |               | Asp87-Asn             | /                 | Thr57-Ser         | x    | x     | x    | x    | x     | x   |
| S13BD02774 | Derby       | 7                | 10               |               |               |                       |                   |                   | x    | x     | x    | x    | x     | x   |
| 10-00260   | Dublin      | 7                | 22               | > 256         | 0.25          | Ser83-Phe             | /                 | /                 | x    | x     | x    | x    | x     | x   |
| 10-01266   | Dublin      | 7                | 25               | > 256         | 0.25          | Ser83-Phe             | /                 | /                 | x    | x     | x    | x    | x     | x   |
| 10-04604   | Dublin      | 7                | 25               | > 256         | 0.25          | Ser83-Phe             |                   | /                 | x    | x     | x    | x    | x     | x   |
| 10-04446   | Dublin      | 7                | 25               | > 256         | 0.25          | Ser83-Phe             |                   | /                 | x    | x     | x    | x    | x     | x   |
| 11-0294    | Dublin      | 7                | 26               | 12            | 0.016         |                       |                   |                   | x    | x     | x    | x    | x     | x   |
| 09-02976   | Dublin      | 7                | 26               |               |               | Ser83-Phe             | /                 | /                 |      |       |      |      |       |     |
| 12-0522    | Dublin      | 7                | 28               |               |               | Ser83-Phe             | /                 | /                 | x    | x     | x    | x    | x     | x   |
| S13BD03130 | Dublin      | 7                | 23               |               |               |                       |                   |                   | x    | x     | x    | x    | x     | x   |
| 10-02502   | Enteritidis | 7                | 22               | > 256         | 0.25          | Ser83-Tyr             |                   | /                 | x    | x     | x    | x    | x     | x   |
| 10-02583   | Enteritidis | 7                | 23               | > 256         | 0.19          | Asp87-Tyr             |                   | /                 | x    | x     | x    | x    | x     | x   |
| 10-01948   | Enteritidis | 7                | 24               | > 256         | 0.19          | Asp87-Tyr             |                   | /                 | x    | x     | x    | x    | x     | x   |
| 10-02820   | Enteritidis | 7                | 24               | > 256         | 0.19          | Ser83-Tyr             |                   | /                 | x    | x     | x    | x    | x     | x   |
| 10-02324   | Enteritidis | 7                | 24               | > 256         | 0.125         | Ser83-Phe / Asp87-Asn |                   | /                 | x    | x     | x    | x    | x     | x   |
| 10-05384   | Enteritidis | 7                | 24               | > 256         | 0.125         | Asp87-Tyr             |                   | /                 | x    | x     | x    | x    | x     | x   |
| 10-02544   | Enteritidis | 7                | 24               | > 256         | 0.19          | Asp87-Tyr             |                   | /                 | x    | x     | x    | x    | x     | x   |
| 10-03244   | Enteritidis | 7                | 24               | > 256         | 0.25          | Ser83-Tyr             |                   | /                 | x    | x     | x    | x    | x     | x   |
| 10-05117   | Enteritidis | 7                | 25               | > 256         | 0.125         | Asp87-Tyr             | /                 |                   | x    | x     | x    | x    | x     | x   |
| 10-02667   | Enteritidis | 7                | 25               | > 256         | 0.125         | Ser83-Tyr / Asp87-Asn |                   | /                 | x    | x     | x    | x    | x     | x   |
| 10-02055   | Enteritidis | 7                | 25               | > 256         | 0.125         | Ser83-Phe             |                   | /                 | x    | x     | x    | x    | x     | x   |
| 10-05178   | Enteritidis | 7                | 25               | > 256         | 0.19          | Asp87-Tyr             | /                 | /                 | x    | x     | x    | x    | x     | x   |
| 10-01596   | Enteritidis | 7                | 25               | > 256         | 0.125         | Asp87-Tyr             | /                 | /                 | x    | x     | x    | x    | x     | x   |

|          |             |   |    |       |       |           |   |   |   |   |   |   |   |   |
|----------|-------------|---|----|-------|-------|-----------|---|---|---|---|---|---|---|---|
| 10-00119 | Enteritidis | 7 | 25 | > 256 | 0.19  | Asp87-Asn | / | / | x | x | x | x | x | x |
| 10-01573 | Enteritidis | 7 | 25 | > 256 | 0.19  | Asp87-Tyr | / | / | x | x | x | x | x | x |
| 10-02601 | Enteritidis | 7 | 26 | > 256 | 0.94  | /         | / | / | x | x | x | x | x | x |
| 10-01475 | Enteritidis | 7 | 27 | > 256 | 0.094 | Asp87-Asn | / | / | x | x | x | x | x | x |
| 10-03570 | Enteritidis | 7 | 29 | > 256 | 0.094 | Asp87-Gly | / | / | x | x | x | x | x | x |
| 11-1562  | Enteritidis | 7 | 24 | >256  | 0.125 | Asp87-Tyr | / | / | x | x | x | x | x | x |
| 11-0227  | Enteritidis | 7 | 24 | >256  | 0.19  | Asp87-Asn | / | / | x | x | x | x | x | x |
| 11-0809  | Enteritidis | 7 | 23 | >256  | 0.25  | Ser83-Phe | / | / | x | x | x | x | x | x |
| 11-1090  | Enteritidis | 7 | 24 | >256  | 0.19  | Asp87-Asn | / | / | x | x | x | x | x | x |
| 11-1179  | Enteritidis | 7 | 24 | >256  | 0.19  | Asp87-Tyr | / | / | x | x | x | x | x | x |
| 11-1217  | Enteritidis | 7 | 24 | >256  | 0.125 | Asp87-Tyr | / | / | x | x | x | x | x | x |
| 11-1296  | Enteritidis | 7 | 25 | >256  | 0.094 | Asp87-Gly | / | / | x | x | x | x | x | x |
| 11-1576  | Enteritidis | 7 | 24 | >256  | 0.125 | Asp87-Tyr | / | / | x | x | x | x | x | x |
| 11-0811  | Enteritidis | 7 | 25 | >256  | 0.19  | Asp87-Tyr | / | / | x | x | x | x | x | x |
| 11-0307  | Enteritidis | 7 | 26 | >256  | 0.125 | Asp87-Tyr | / | / | x | x | x | x | x | x |
| 11-0921  | Enteritidis | 7 | 26 | >256  | 0.125 | Asp87-Tyr | / | / | x | x | x | x | x | x |
| 11-0580  | Enteritidis | 7 | 26 | >256  | 0.19  | Asp87-Asn | / | / | x | x | x | x | x | x |
| 11-0299  | Enteritidis | 7 | 25 | >256  | 0.19  | Asp87-Asn | / | / | x | x | x | x | x | x |
| 11-0480  | Enteritidis | 7 | 25 | >256  | 0.19  | Asp87-Tyr | / | / | x | x | x | x | x | x |
| 11-0107  | Enteritidis | 7 | 26 | >256  | 0.125 | Asp87-Tyr | / | / | x | x | x | x | x | x |
| 11-1468  | Enteritidis | 7 | 26 | >256  | 0.125 | Asp87-Asn | / | / | x | x | x | x | x | x |
| 09-01903 | Enteritidis | 7 | 24 |       |       | /         | / | / | x | x | x | x | x | x |
| 09-02798 | Enteritidis | 7 | 22 |       |       | Asp87-Asn | / | / |   |   |   |   |   |   |
| 09-02875 | Enteritidis | 7 | 23 |       |       | Asp87-Tyr | / | / |   |   |   |   |   |   |
| 09-01313 | Enteritidis | 7 | 23 | > 256 | 0,125 | Ser83-Tyr | / | / |   |   |   |   |   |   |
| 09-01902 | Enteritidis | 7 | 23 |       |       | /         | / | / | x | x | x | x | x | x |
| 09-02118 | Enteritidis | 7 | 23 |       |       | /         | / | / | x | x | x | x | x | x |
| 09-02730 | Enteritidis | 7 | 24 |       |       | Asp87-Tyr | / | / | x | x | x | x | x | x |
| 09-02872 | Enteritidis | 7 | 25 |       |       | Asp87-Tyr | / | / | x | x | x | x | x | x |
| 09-00769 | Enteritidis | 7 | 26 |       |       |           |   |   | x | x | x | x | x | x |
| 09-01055 | Enteritidis | 7 | 24 |       |       |           |   |   | x | x | x | x | x | x |



|          |             |   |    |       |      |           |   |   |   |   |   |   |   |   |
|----------|-------------|---|----|-------|------|-----------|---|---|---|---|---|---|---|---|
| 09-01628 | Enteritidis | 7 | 20 | > 256 | 0,50 | Asp87-Tyr | / | / |   |   |   |   |   |   |
| 09-02170 | Enteritidis | 7 | 24 |       |      | /         | / | / |   |   |   |   |   |   |
| 09-02731 | Enteritidis | 7 | 24 |       |      | Asp87-Tyr | / | / | x | x | x | x | x | x |
| 09-02759 | Enteritidis | 7 | 25 |       |      | Asp87-Asn | / | / | x | x | x | x | x | x |
| 09-02892 | Enteritidis | 7 | 24 |       |      | Asp87-Tyr | / | / |   |   |   |   |   |   |
| 09-03111 | Enteritidis | 7 | 25 |       |      | /         | / | / |   |   |   |   |   |   |
| 09-04522 | Enteritidis | 7 | 25 | > 256 | 16   | /         | / | / |   |   |   |   |   |   |
| 09-00104 | Enteritidis | 7 | 24 |       |      |           |   |   |   |   |   |   |   |   |
| 09-00157 | Enteritidis | 7 | 25 |       |      |           |   |   |   |   |   |   |   |   |
| 09-00335 | Enteritidis | 7 | 27 |       |      |           |   |   |   |   |   |   |   |   |
| 09-00969 | Enteritidis | 7 | 27 |       |      |           |   |   |   |   |   |   |   |   |
| 09-00975 | Enteritidis | 7 | 25 |       |      |           |   |   |   |   |   |   |   |   |
| 09-01186 | Enteritidis | 7 | 26 |       |      |           |   |   |   |   |   |   |   |   |
| 09-01414 | Enteritidis | 7 | 26 |       |      | Asp87-Asn | / | / |   |   |   |   |   |   |
| 09-02050 | Enteritidis | 7 | 20 |       |      | Asp87-Tyr | / | / | x | x | x | x | x | x |
| 09-03113 | Enteritidis | 7 | 25 |       |      |           |   |   |   |   |   |   |   |   |
| 09-03662 | Enteritidis | 7 | 26 |       |      | Asp87-Tyr | / | / |   |   |   |   |   |   |
| 09-00155 | Enteritidis | 7 | 24 |       |      |           |   |   |   |   |   |   |   |   |
| 09-00479 | Enteritidis | 7 | 24 |       |      |           |   |   |   |   |   |   |   |   |
| 09-00512 | Enteritidis | 7 | 24 |       |      |           |   |   |   |   |   |   |   |   |
| 09-00595 | Enteritidis | 7 | 24 |       |      |           |   |   |   |   |   |   |   |   |
| 09-02014 | Enteritidis | 7 | 26 |       |      | Asp87-Asn | / | / |   |   |   |   |   |   |
| 09-02670 | Enteritidis | 7 | 24 |       |      | /         | / | / | x | x | x | x | x |   |
| 09-03016 | Enteritidis | 7 | 20 |       |      |           |   |   |   |   |   |   |   |   |
| 09-04018 | Enteritidis | 7 | 28 |       |      | Asp87-Tyr | / | / |   |   |   |   |   |   |
| 09-00760 | Enteritidis | 7 | 25 |       |      |           |   |   |   |   |   |   |   |   |
| 09-04086 | Enteritidis | 7 | 27 | > 256 | 0,19 | Ser83-Tyr | / | / |   |   |   |   |   |   |
| 09-04338 | Enteritidis | 7 | 29 | > 256 | 0,19 | Asp87-Tyr | / | / |   |   |   |   |   |   |
| 09-03586 | Enteritidis | 7 | 29 |       |      | Asp87-Tyr | / | / |   |   |   |   |   |   |
| 09-03592 | Enteritidis | 7 | 27 |       |      | Ser83-Phe | / | / |   |   |   |   |   |   |
| 09-03402 | Enteritidis | 7 | 30 |       |      | Asp87-Asn | / | / |   |   |   |   |   |   |

|          |             |   |    |           |   |   |   |   |   |   |       |   |
|----------|-------------|---|----|-----------|---|---|---|---|---|---|-------|---|
| 10-00081 | Enteritidis | 7 | 23 | /         | / | / | x | x | x | x | x     | x |
| 10-01928 | Enteritidis | 7 | 34 |           |   |   |   |   |   |   |       |   |
| 11-3705  | Enteritidis | 7 | 24 |           |   |   | x | x | x | x | x     | x |
| 11-4075  | Enteritidis | 7 | 26 |           |   |   |   |   |   |   |       |   |
| 11-4200  | Enteritidis | 7 | 22 | /         | / | / | x | x | x | x | x     | x |
| 11-3774  | Enteritidis | 7 | 24 |           |   |   |   |   |   |   |       |   |
| 11-4605  | Enteritidis | 7 | 27 |           |   |   |   |   |   |   |       |   |
| 11-1791  | Enteritidis | 7 | 25 |           |   |   | x | x | x | x | x     | x |
| 11-2358  | Enteritidis | 7 | 26 |           |   |   |   |   |   |   |       |   |
| 11-2387  | Enteritidis | 7 | 27 |           |   |   |   |   |   |   |       |   |
| 11-1945  | Enteritidis | 7 | 25 |           |   |   |   |   |   |   |       |   |
| 11-2398  | Enteritidis | 7 | 26 |           |   |   |   |   |   |   |       |   |
| 11-1824  | Enteritidis | 7 | 26 |           |   |   |   |   |   |   |       |   |
| 11-3674  | Enteritidis | 7 | 28 |           |   |   |   |   |   |   |       |   |
| 11-2445  | Enteritidis | 7 | 26 |           |   |   |   |   |   |   |       |   |
| 11-4062  | Enteritidis | 7 | 27 |           |   |   |   |   |   |   |       |   |
| 11-3886  | Enteritidis | 7 | 29 |           |   |   |   |   |   |   |       |   |
| 11-3653  | Enteritidis | 7 | 28 |           |   |   |   |   |   |   |       |   |
| 11-4155  | Enteritidis | 7 | 29 |           |   |   | x | x | x | x | x     | x |
| 11-3046  | Enteritidis | 7 | 23 |           |   |   |   |   |   |   |       |   |
| 11-4603  | Enteritidis | 7 | 24 |           |   |   | x | x | x | x | x     | x |
| 11-3132  | Enteritidis | 7 | 24 |           |   |   |   |   |   |   |       |   |
| 11-3356  | Enteritidis | 7 | 24 |           |   |   |   |   |   |   |       |   |
| 11-3033  | Enteritidis | 7 | 26 |           |   |   |   |   |   |   |       |   |
| 12-1288  | Enteritidis | 7 | 27 |           |   |   | x | x | x | x | x     | x |
| 12-0429  | Enteritidis | 7 | 23 |           |   |   | x | x | x | x | x     | x |
| 12-0872  | Enteritidis | 7 | 24 |           |   |   | x | x | x | x | x     | x |
| 12-0832  | Enteritidis | 7 | 25 |           |   |   | x | x | x | x | x     | x |
| 12-1724  | Enteritidis | 7 | 24 |           |   |   | x | x | x | x | x     | x |
| 12-0788  | Enteritidis | 7 | 25 | Ser83-Tyr | / | / | x | x | x | x | QnrS1 | x |
| 12-2589  | Enteritidis | 7 | 26 |           |   |   | x | x | x | x | x     | x |

|         |             |   |    |           |   |   |   |   |   |   |   |   |
|---------|-------------|---|----|-----------|---|---|---|---|---|---|---|---|
| 12-2606 | Enteritidis | 7 | 26 |           |   |   | x | x | x | x | x | x |
| 12-1995 | Enteritidis | 7 | 28 |           |   |   | x | x | x | x | x | x |
| 12-2592 | Enteritidis | 7 | 26 |           |   |   | x | x | x | x | x | x |
| 12-2687 | Enteritidis | 7 | 26 | Asp87-Tyr |   | / | x | x | x | x | x | x |
| 12-2751 | Enteritidis | 7 | 28 | Asp87-Tyr | / | / | x | x | x | x | x | x |
| 12-2396 | Enteritidis | 7 | 25 | Asp87-Tyr | / | / | x | x | x | x | x | x |
| 12-1812 | Enteritidis | 7 | 25 |           |   |   | x | x | x | x | x | x |
| 12-3060 | Enteritidis | 7 | 26 |           |   |   | x | x | x | x | x | x |
| 12-2867 | Enteritidis | 7 | 25 |           |   |   | x | x | x | x | x | x |
| 12-2590 | Enteritidis | 7 | 25 |           |   |   | x | x | x | x | x | x |
| 12-1062 | Enteritidis | 7 | 25 |           |   |   | x | x | x | x | x | x |
| 12-2687 | Enteritidis | 7 | 26 |           |   |   |   |   |   |   |   |   |
| 12-2793 | Enteritidis | 7 | 27 |           |   |   | x | x | x | x | x | x |
| 12-3972 | Enteritidis | 7 | 25 |           |   |   | x | x | x | x | x | x |
| 12-3578 | Enteritidis | 7 | 27 | Asp87-Tyr | / | / | x | x | x | x | x | x |
| 12-1442 | Enteritidis | 7 | 26 |           |   |   | x | x | x | x | x | x |
| 12-4602 | Enteritidis | 7 | 27 |           |   |   | x | x | x | x | x | x |
| 12-2419 | Enteritidis | 7 | 26 | Asp87-Tyr | / | / | x | x | x | x | x | x |
| 12-2717 | Enteritidis | 7 | 26 |           |   |   | x | x | x | x | x | x |
| 12-0033 | Enteritidis | 7 | 29 |           |   |   | x | x | x | x | x | x |
| 12-4732 | Enteritidis | 7 | 28 |           |   |   | x | x | x | x | x | x |
| 12-2420 | Enteritidis | 7 | 26 |           |   |   | x | x | x | x | x | x |
| 12-4319 | Enteritidis | 7 | 27 | Asp87-Tyr | / | / | x | x | x | x | x | x |
| 12-2426 | Enteritidis | 7 | 27 |           |   |   | x | x | x | x | x | x |
| 12-2991 | Enteritidis | 7 | 28 |           |   |   | x | x | x | x | x | x |
| 12-3351 | Enteritidis | 7 | 25 |           |   |   | x | x | x | x | x | x |
| 12-0443 | Enteritidis | 7 | 32 |           |   |   | x | x | x | x | x | x |
| 12-0136 | Enteritidis | 7 | 28 |           |   |   | x | x | x | x | x | x |
| 12-4605 | Enteritidis | 7 | 27 |           |   |   | x | x | x | x | x | x |
| 12-4290 | Enteritidis | 7 | 27 | Asp87-Tyr | / | / | x | x | x | x | x | x |
| 12-0123 | Enteritidis | 7 | 26 |           |   |   | x | x | x | x | x | x |

|            |             |   |    |           |   |   |  |   |   |   |   |   |   |
|------------|-------------|---|----|-----------|---|---|--|---|---|---|---|---|---|
| 12-0073    | Enteritidis | 7 | 28 |           |   |   |  |   |   |   |   |   |   |
| S13BD03234 | ENTERITIDIS | 7 | 24 |           |   |   |  | X | X | X | X | X | X |
| S13BD02512 | ENTERITIDIS | 7 | 27 |           |   |   |  | X | X | X | X | X | X |
| S13BD00845 | ENTERITIDIS | 7 | 26 |           |   |   |  | X | X | X | X | X | X |
| S13BD03049 | ENTERITIDIS | 7 | 26 |           |   |   |  | X | X | X | X | X | X |
| S13BD01534 | ENTERITIDIS | 7 | 25 | Asp87-Tyr | / | / |  | X | X | X | X | X | X |
| S13BD03810 | ENTERITIDIS | 7 | 26 |           |   |   |  | X | X | X | X | X | X |
| S13BD03251 | ENTERITIDIS | 7 | 29 |           |   |   |  | X | X | X | X | X | X |
| S13BD02391 | ENTERITIDIS | 7 | 27 |           |   |   |  | X | X | X | X | X | X |
| S14BD00223 | ENTERITIDIS | 7 | 27 |           |   |   |  | X | X | X | X | X | X |
| S13BD02433 | ENTERITIDIS | 7 | 28 |           |   |   |  | X | X | X | X | X | X |
| S13BD02889 | ENTERITIDIS | 7 | 24 |           |   |   |  | X | X | X | X | X | X |
| S13BD01770 | ENTERITIDIS | 7 | 27 | Asp87-Tyr | / | / |  | X | X | X | X | X | X |
| S13BD04011 | ENTERITIDIS | 7 | 27 | Asp87-Tyr | / | / |  | X | X | X | X | X | X |
| S13BD01784 | ENTERITIDIS | 7 | 26 | Asp87-Asn | / | / |  | X | X | X | X | X | X |
| S13BD04458 | ENTERITIDIS | 7 | 28 | Asp87-Tyr | / | / |  | X | X | X | X | X | X |
| S13BD00929 | ENTERITIDIS | 7 | 26 |           |   |   |  | X | X | X | X | X | X |
| S13BD00695 | ENTERITIDIS | 7 | 24 |           |   |   |  | X | X | X | X | X | X |
| S13BD02248 | ENTERITIDIS | 7 | 27 |           |   |   |  | X | X | X | X | X | X |
| S13BD00835 | ENTERITIDIS | 7 | 26 |           |   |   |  | X | X | X | X | X | X |
| S13BD02660 | ENTERITIDIS | 7 | 26 |           |   |   |  | X | X | X | X | X | X |
| S13BD02885 | ENTERITIDIS | 7 | 25 |           |   |   |  | X | X | X | X | X | X |
| S13BD01265 | ENTERITIDIS | 7 | 28 | Asp87-Tyr | / | / |  | X | X | X | X | X | X |
| S13BD02940 | ENTERITIDIS | 7 | 27 |           |   |   |  | X | X | X | X | X | X |
| S13BD02537 | ENTERITIDIS | 7 | 26 |           |   |   |  | X | X | X | X | X | X |
| S13BD03095 | ENTERITIDIS | 7 | 27 |           |   |   |  | X | X | X | X | X | X |
| S13BD00633 | ENTERITIDIS | 7 | 25 |           |   |   |  | X | X | X | X | X | X |
| S13BD02399 | ENTERITIDIS | 7 | 25 |           |   |   |  | X | X | X | X | X | X |
| S13BD01483 | ENTERITIDIS | 7 | 25 |           |   |   |  | X | X | X | X | X | X |
| S13BD04373 | ENTERITIDIS | 7 | 22 |           |   |   |  | X | X | X | X | X | X |
| S13BD01804 | ENTERITIDIS | 7 | 28 |           |   |   |  | X | X | X | X | X | X |

|                   |             |   |    |       |        |                       |   |                       |   |   |   |       |   |   |
|-------------------|-------------|---|----|-------|--------|-----------------------|---|-----------------------|---|---|---|-------|---|---|
| <b>S13BD01796</b> | ENTERITIDIS | 7 | 27 |       |        |                       |   |                       | x | x | x | x     | x | x |
| <b>S13BD02772</b> | ENTERITIDIS | 7 | 27 |       |        |                       |   |                       | x | x | x | x     | x | x |
| <b>S13BD02375</b> | ENTERITIDIS | 7 | 27 |       |        |                       |   |                       | x | x | x | x     | x | x |
| <b>S13BD02129</b> | ENTERITIDIS | 7 | 27 |       |        |                       |   |                       | x | x | x | x     | x | x |
| <b>S13BD01034</b> | ENTERITIDIS | 7 | 27 |       |        | Asp87-Tyr             | / | /                     | x | x | x | x     | x | x |
| <b>S13BD03022</b> | ENTERITIDIS | 7 | 27 |       |        |                       |   |                       | x | x | x | x     | x | x |
| <b>10-02364</b>   | Hadar       | 7 | 24 | > 256 | 0,38-- | Ser83-Phe / Asp87-Asn |   | Thr57-Ser             | x | x | x | x     | x | x |
| <b>10-00907</b>   | Hadar       | 7 | 25 | > 256 | 0.19   | Asp87-Asn             | / | Thr57-Ser             | x | x | x | x     | x | x |
| <b>10-05419</b>   | Hadar       | 7 | 26 | > 256 | 0.19   | Asp87-Asn             | / | Thr57-Ser / Ser80-Ile | x | x | x | x     | x | x |
| <b>11-4700</b>    | Hadar       | 7 | 7  | >256  | >32    | Asp87-Asn             | / | The57-Ser             | x | x | x | x     | x | x |
| <b>11-4178</b>    | Hadar       | 7 | 26 | >256  | 0.19   | Asp87-Asn             | / | The57-Ser             | x | x | x | x     | x | x |
| <b>11-2838</b>    | Hadar       | 7 | 24 | >256  | 0.19   | Asp87-Asn             | / | The57-Ser             | x | x | x | x     | x | x |
| <b>11-0985</b>    | Hadar       | 7 | 25 | >256  | 0.19   | Asp87-Asn             | / | The57-Ser             | x | x | x | x     | x | x |
| <b>11-3178</b>    | Hadar       | 7 | 24 | >256  | 0.25   | Ser83-Phe             | / | The57-Ser             | x | x | x | x     | x | x |
| <b>11-3929</b>    | Hadar       | 7 | 30 | >256  | 0.19   | Asp87-Tyr             | / | The57-Ser             | x | x | x | x     | x | x |
| <b>11-3822</b>    | Hadar       | 7 | 25 | >256  | 0.125  | Asp87-Asn             | / | The57-Ser             | x | x | x | x     | x | x |
| <b>09-01687</b>   | Hadar       | 7 | 23 | > 256 | 1      | Asp87-Asn             | / | Thr57-Ser             | x | x | x | x     | x | x |
| <b>09-00773</b>   | Hadar       | 7 | 25 |       |        |                       |   |                       |   |   |   |       |   |   |
| <b>09-01073</b>   | Hadar       | 7 | 26 |       |        |                       |   |                       |   |   |   |       |   |   |
| <b>09-03048</b>   | Hadar       | 7 | 25 |       |        | /                     | / | /                     |   |   |   |       |   |   |
| <b>09-02232</b>   | Hadar       | 7 | 26 |       |        | Asp87-Asn             | / | Thr57-Ser             |   |   |   |       |   |   |
| <b>09-01141</b>   | Hadar       | 7 | 26 |       |        |                       |   |                       |   |   |   |       |   |   |
| <b>12-2451</b>    | Hadar       | 7 | 29 |       |        |                       |   |                       | x | x | x | x     | x | x |
| <b>12-3810</b>    | Hadar       | 7 | 26 |       |        |                       |   |                       | x | x | x | x     | x | x |
| <b>12-3098</b>    | Hadar       | 7 | 28 |       |        |                       |   |                       | x | x | x | x     | x | x |
| <b>12-3385</b>    | Hadar       | 7 | 28 |       |        | Asp87-Asn             | / | Thr57-Ser             | x | x | x | x     | x | x |
| <b>12-4410</b>    | Hadar       | 7 | 28 |       |        | Asp87-Asn             | / | Thr57-Ser             | x | x | x | x     | x | x |
| <b>S13BD00677</b> | HADAR       | 7 | 19 |       |        | Asp87-Asn             | / | Thr57-Ser             | x | x | x | x     | x | x |
| <b>S13BD02538</b> | HADAR       | 7 | 27 |       |        | Asp87-Asn             | / | Thr57-Ser             | x | x | x | x     | x | x |
| <b>S13BD01038</b> | HADAR       | 7 | 29 |       |        | Asp87-Asn             | / | Thr57-Ser             | x | x | x | QnrD1 | x | x |



|                   |          |   |    |       |      |                       |   |                       |   |       |   |   |   |   |
|-------------------|----------|---|----|-------|------|-----------------------|---|-----------------------|---|-------|---|---|---|---|
| <b>12-3591</b>    | Infantis | 7 | 31 |       |      |                       |   |                       | x | x     | x | x | x | x |
| <b>12-4502</b>    | Infantis | 7 | 25 |       |      |                       |   |                       | x | x     | x | x | x | x |
| <b>12-3544</b>    | Infantis | 7 | 23 |       |      |                       |   |                       | x | x     | x | x | x | x |
| <b>12-3465</b>    | Infantis | 7 | 25 |       |      |                       |   |                       | x | x     | x | x | x | x |
| <b>12-0704</b>    | Infantis | 7 | 23 |       |      |                       |   |                       | x | x     | x | x | x | x |
| <b>12-0680</b>    | Infantis | 7 | 23 |       |      |                       |   |                       | x | x     | x | x | x | x |
| <b>12-2399</b>    | Infantis | 7 | 29 |       |      |                       |   |                       | x | x     | x | x | x | x |
| <b>12-0126</b>    | Infantis | 7 | 25 |       |      |                       |   |                       |   |       |   |   |   |   |
| <b>12-0218</b>    | Infantis | 7 | 25 |       |      | Ser83-Tyr             | / | Thr57-Ser             | x | x     | x | x | x | x |
| <b>12-0125</b>    | Infantis | 7 | 32 |       |      | Asp87-Tyr             | / | Thr57-Ser             | x | x     | x | x | x | x |
| <b>12-3352</b>    | Infantis | 7 | 30 |       |      | Ser83-Tyr             | / | Thr57-Ser             | x | x     | x | x | x | x |
| <b>S13BD03795</b> | INFANTIS | 7 | 29 |       |      |                       |   |                       | x | QnrB5 | x | x | x | x |
| <b>S13BD01263</b> | INFANTIS | 7 | 24 |       |      | Asp87-Tyr             | / |                       | x | x     | x | x | x | x |
| <b>S13BD03628</b> | INFANTIS | 7 | 30 |       |      | Asp87-Tyr             | / | Thr57-Ser             | x | x     | x | x | x | x |
| <b>S13BD02584</b> | INFANTIS | 7 | 29 |       |      |                       |   |                       | x | x     | x | x | x | x |
| <b>S13BD01767</b> | INFANTIS | 7 | 25 |       |      |                       |   |                       | x | x     | x | x | x | x |
| <b>S13BD01517</b> | INFANTIS | 7 | 25 |       |      |                       |   |                       | x | x     | x | x | x | x |
| <b>S13BD00141</b> | INFANTIS | 7 | 22 |       |      |                       |   |                       | x | x     | x | x | x | x |
| <b>10-03189</b>   | Kentucky | 7 | 7  | > 256 | > 32 | Ser83-Phe / Asp87-Asn | / | Thr57-Ser / Ser80-Ile | x | x     | x | x | x | x |
| <b>10-05215</b>   | Kentucky | 7 | 7  | >256  | >32  | Ser83-Phe / Asp87-Asn | / | Thr57-Ser / Ser80-Ile | x | x     | x | x | x | x |
| <b>10-03581</b>   | Kentucky | 7 | 7  | >256  | 32   | Ser83-Phe / Asp87-Asn | / | Thr57-Ser / Ser80-Ile | x | x     | x | x | x | x |
| <b>10-02743</b>   | Kentucky | 7 | 7  | > 256 | > 32 | Ser83-Phe / Asp87-Asn | / | Thr57-Ser / Ser80-Ile | x | x     | x | x | x | x |
| <b>10-02858</b>   | Kentucky | 7 | 7  | >256  | >32  | Ser83-Phe / Asp87-Asn | / | Thr57-Ser / Ser80-Ile | x | x     | x | x | x | x |
| <b>10-02957</b>   | Kentucky | 7 | 7  | > 256 | 12   | Ser83-Phe / Asp87-Asn | / | Thr57-Ser / Ser80-Ile | x | x     | x | x | x | x |
| <b>10-03093</b>   | Kentucky | 7 | 7  | >256  | 24   | Ser83-Phe / Asp87-Asn | / | Thr57-Ser / Ser80-Ile | x | x     | x | x | x | x |
| <b>10-03916</b>   | Kentucky | 7 | 7  | >256  | 16   | Ser83-Phe / Asp87-Asn |   | Thr57-Ser / Ser80-Ile | x | x     | x | x | x | x |

|                 |          |   |    |       |    |                       |   |                       |   |   |   |   |   |   |
|-----------------|----------|---|----|-------|----|-----------------------|---|-----------------------|---|---|---|---|---|---|
| <b>10-02799</b> | Kentucky | 7 | 7  | >256  | 24 | Ser83-Phe / Asp87-Asn | / | Thr57-Ser / Ser80-Ile | x | x | x | x | x | x |
| <b>10-00431</b> | Kentucky | 7 | 7  | > 256 | 8  | Ser83-Phe / Asp87-Asn | / | Thr57-Ser / Ser80-Ile | x | x | x | x | x | x |
| <b>10-00483</b> | Kentucky | 7 | 7  | > 256 | 8  | Ser83-Phe / Asp87-Asn | / | Thr57-Ser / Ser80-Ile | x | x | x | x | x | x |
| <b>10-04973</b> | Kentucky | 7 | 9  | >256  | 32 | Ser83-Phe / Asp87-Asn |   | Thr57-Ser / Ser80-Ile | x | x | x | x | x | x |
| <b>10-03134</b> | Kentucky | 7 | 9  | > 256 | 24 | Ser83-Phe / Asp87-Asn | / | Thr57-Ser / Ser80-Ile | x | x | x | x | x | x |
| <b>10-02242</b> | Kentucky | 7 | 9  | > 256 | 32 | Ser83-Phe / Asp87-Asn | / | Thr57-Ser / Ser80-Ile | x | x | x | x | x | x |
| <b>10-03018</b> | Kentucky | 7 | 9  | >256  | 8  | Ser83-Phe / Asp87-Asn | / | Thr57-Ser / Ser80-Ile | x | x | x | x | x | x |
| <b>10-01977</b> | Kentucky | 7 | 9  | > 256 | 12 | Ser83-Phe / Asp87-Asn | / | Thr57-Ser / Ser80-Ile | x | x | x | x | x | x |
| <b>10-00094</b> | Kentucky | 7 | 9  | > 256 | 6  | Ser83-Phe / Asp87-Tyr | / | Thr57-Ser / Ser80-Ile | x | x | x | x | x | x |
| <b>10-02624</b> | Kentucky | 7 | 9  | > 256 | 6  | Ser83-Phe / Asp87-Asn | / | Thr57-Ser / Ser80-Ile | x | x | x | x | x | x |
| <b>10-00823</b> | Kentucky | 7 | 9  | >256  | 24 | Ser83-Phe / Asp87-Asn | / | Thr57-Ser / Ser80-Ile | x | x | x | x | x | x |
| <b>10-02432</b> | Kentucky | 7 | 9  | > 256 | 12 | Ser83-Phe / Asp87-Asn | / | Thr57-Ser / Ser80-Ile | x | x | x | x | x | x |
| <b>10-05078</b> | Kentucky | 7 | 10 | >256  | 8  | Ser83-Phe / Asp87-Tyr |   | Thr57-Ser / Ser80-Ile | x | x | x | x | x | x |
| <b>10-04840</b> | Kentucky | 7 | 10 | >256  | 8  | Ser83-Phe / Asp87-Gly | / | Thr57-Ser / Ser80-Ile | x | x | x | x | x | x |
| <b>10-05037</b> | Kentucky | 7 | 10 | >256  | 8  | Ser83-Phe             |   | Thr57-Ser / Ser80-Ile | x | x | x | x | x | x |
| <b>10-02932</b> | Kentucky | 7 | 10 | >256  | 24 | Ser83-Phe / Asp87-Asn | / | Thr57-Ser / Ser80-Ile | x | x | x | x | x | x |
| <b>10-05120</b> | Kentucky | 7 | 10 | >256  | 16 | Ser83-Phe / Asp87-Asn |   | Thr57-Ser / Ser80-Ile | x | x | x | x | x | x |
| <b>10-05286</b> | Kentucky | 7 | 10 | >256  | 16 | Ser83-Phe / Asp87-Asn |   | Thr57-Ser / Ser80-Ile | x | x | x | x | x | x |
| <b>10-05177</b> | Kentucky | 7 | 10 | >256  | 24 | Ser83-Phe / Asp87-Asn |   | Thr57-Ser / Ser80-Ile | x | x | x | x | x | x |
| <b>10-04970</b> | Kentucky | 7 | 10 | >256  | 16 | Ser83-Phe / Asp87-Asn |   | Thr57-Ser / Ser80-Ile | x | x | x | x | x | x |



|                 |          |   |    |       |      |                       |   |                       |   |   |   |   |   |   |
|-----------------|----------|---|----|-------|------|-----------------------|---|-----------------------|---|---|---|---|---|---|
| <b>10-05460</b> | Kentucky | 7 | 10 | >256  | 16   | Ser83-Phe / Asp87-Asn |   | Thr57-Ser / Ser80-Ile | x | x | x | x | x | x |
| <b>10-03217</b> | Kentucky | 7 | 10 | > 256 | 0.19 | Ser83-Phe / Asp87-Asn | / | Thr57-Ser / Ser80-Ile | x | x | x | x | x | x |
| <b>10-02378</b> | Kentucky | 7 | 10 | > 256 | 12   | Ser83-Phe / Asp87-Asn | / | Thr57-Ser / Ser80-Ile | x | x | x | x | x | x |
| <b>10-01718</b> | Kentucky | 7 | 10 | > 256 | 24   | Ser83-Phe / Asp87-Asn | / | Thr57-Ser / Ser80-Ile | x | x | x | x | x | x |
| <b>10-02426</b> | Kentucky | 7 | 10 | > 256 | 16   | Ser83-Phe / Asp87-Asn | / | Thr57-Ser / Ser80-Ile | x | x | x | x | x | x |
| <b>10-04617</b> | Kentucky | 7 | 11 | >256  | 8    | Ser83-Phe / Asp87-Asn |   | Thr57-Ser / Ser80-Ile | x | x | x | x | x | x |
| <b>10-05459</b> | Kentucky | 7 | 11 | >256  | 16   | Ser83-Phe / Asp87-Asn |   | Thr57-Ser / Ser80-Ile | x | x | x | x | x | x |
| <b>10-03278</b> | Kentucky | 7 | 11 | > 256 | 6    | Ser83-Phe / Asp87-Asn | / | Thr57-Ser / Ser80-Ile | x | x | x | x | x | x |
| <b>10-01143</b> | Kentucky | 7 | 11 | >256  | 16   | Ser83-Phe / Asp87-Asn | / | Thr57-Ser / Ser80-Ile | x | x | x | x | x | x |
| <b>10-02453</b> | Kentucky | 7 | 11 | >256  | 32   | Ser83-Phe / Asp87-Asn | / | Thr57-Ser / Ser80-Ile | x | x | x | x | x | x |
| <b>10-05569</b> | Kentucky | 7 | 12 | >256  | 32   | Ser83-Phe             |   | Thr57-Ser / Ser80-Ile | x | x | x | x | x | x |
| <b>11-4366</b>  | Kentucky | 7 | 10 | >256  | 12   | Ser83-Phe / Asp87-Tyr | / | The57-Ser / Ser80-Ile | x | x | x | x | x | x |
| <b>11-2754</b>  | Kentucky | 7 | 10 | >256  | 16   | Ser83-Phe / Asp87-Asn | / | The57-Ser / Ser80-Ile | x | x | x | x | x | x |
| <b>11-3991</b>  | Kentucky | 7 | 8  | >256  | 16   | Ser83-Phe / Asp87-Asn | / | The57-Ser / Ser80-Ile | x | x | x | x | x | x |
| <b>11-3620</b>  | Kentucky | 7 | 11 | >256  | 8    | Ser83-Phe / Asp87-Tyr | / | The57-Ser / Ser80-Ile | x | x | x | x | x | x |
| <b>11-0112</b>  | Kentucky | 7 | 11 | >256  | 12   | Ser83-Phe / Asp87-Tyr | / | The57-Ser / Ser80-Ile | x | x | x | x | x | x |
| <b>11-0673</b>  | Kentucky | 7 | 8  | >256  | 8    | Ser83-Phe / Asp87-Tyr | / | The57-Ser / Ser80-Ile | x | x | x | x | x | x |
| <b>11-2779</b>  | Kentucky | 7 | 10 | >256  | 8    | Ser83-Phe / Asp87-Tyr | / | The57-Ser / Ser80-Ile | x | x | x | x | x | x |
| <b>11-0355</b>  | Kentucky | 7 | 12 | >256  | 6    | Ser83-Phe / Asp87-Tyr | / | The57-Ser / Ser80-Ile | x | x | x | x | x | x |
| <b>11-3215</b>  | Kentucky | 7 | 8  | >256  | 12   | Ser83-Phe / Asp87-Asn | / | The57-Ser / Ser80-Ile | x | x | x | x | x | x |

|                |          |   |    |      |     |                       |   |                       |   |   |   |   |   |   |
|----------------|----------|---|----|------|-----|-----------------------|---|-----------------------|---|---|---|---|---|---|
| <b>11-2794</b> | Kentucky | 7 | 9  | >256 | 16  | Ser83-Phe / Asp87-Asn | / | The57-Ser / Ser80-Ile | x | x | x | x | x | x |
| <b>11-3133</b> | Kentucky | 7 | 7  | >256 | 16  | Ser83-Phe / Asp87-Asn | / | The57-Ser / Ser80-Ile | x | x | x | x | x | x |
| <b>11-2207</b> | Kentucky | 7 | 11 | >256 | 6   | Ser83-Phe / Asp87-Asn | / | The57-Ser / Ser80-Ile | x | x | x | x | x | x |
| <b>11-4262</b> | Kentucky | 7 | 12 | >256 | 8   | Ser83-Phe / Asp87-Tyr | / | The57-Ser / Ser80-Ile | x | x | x | x | x | x |
| <b>11-4514</b> | Kentucky | 7 | 7  | >256 | >32 | Ser83-Phe / Asp87-Tyr | / | The57-Ser / Ser80-Ile | x | x | x | x | x | x |
| <b>11-4283</b> | Kentucky | 7 | 11 | >256 | 8   | Ser83-Phe / Asp87-Gly | / | The57-Ser / Ser80-Ile | x | x | x | x | x | x |
| <b>11-1550</b> | Kentucky | 7 | 12 | >256 | 8   | Ser83-Phe / Asp87-Tyr | / | The57-Ser / Ser80-Ile | x | x | x | x | x | x |
| <b>11-2750</b> | Kentucky | 7 | 8  | >256 | 12  | Ser83-Phe / Asp87-Asn | / | The57-Ser / Ser80-Ile | x | x | x | x | x | x |
| <b>11-0799</b> | Kentucky | 7 | 11 | >256 | 12  | Ser83-Phe / Asp87-Asn | / | The57-Ser / Ser80-Ile | x | x | x | x | x | x |
| <b>11-4717</b> | Kentucky | 7 | 7  | >256 | >32 | Ser83-Phe / Asp87-Tyr | / | The57-Ser / Ser80-Ile | x | x | x | x | x | x |
| <b>11-0255</b> | Kentucky | 7 | 10 | >256 | 12  | Ser83-Phe / Asp87-Asn | / | The57-Ser / Ser80-Ile | x | x | x | x | x | x |
| <b>11-1123</b> | Kentucky | 7 | 7  | >256 | 8   | Ser83-Phe / Asp87-Gly | / | The57-Ser / Ser80-Ile | x | x | x | x | x | x |
| <b>11-3149</b> | Kentucky | 7 | 9  | >256 | 16  | Ser83-Phe / Asp87-Asn | / | The57-Ser / Ser80-Ile | x | x | x | x | x | x |
| <b>11-4263</b> | Kentucky | 7 | 10 | >256 | 6   | Ser83-Phe / Asp87-Tyr | / | The57-Ser / Ser80-Ile | x | x | x | x | x | x |
| <b>11-4461</b> | Kentucky | 7 | 10 | >256 | 12  | Ser83-Phe / Asp87-Tyr | / | The57-Ser / Ser80-Ile | x | x | x | x | x | x |
| <b>11-4664</b> | Kentucky | 7 | 10 | >256 | 12  | Ser83-Phe / Asp87-Asn | / | The57-Ser / Ser80-Ile | x | x | x | x | x | x |
| <b>11-2525</b> | Kentucky | 7 | 7  | >256 | >32 | Ser83-Phe / Asp87-Asn | / | The57-Ser / Ser80-Ile | x | x | x | x | x | x |
| <b>11-4122</b> | Kentucky | 7 | 9  | >256 | 16  | Ser83-Phe / Asp87-Asn | / | The57-Ser / Ser80-Ile | x | x | x | x | x | x |
| <b>11-2243</b> | Kentucky | 7 | 7  | >256 | 12  | Ser83-Phe / Asp87-Asn | / | The57-Ser / Ser80-Ile | x | x | x | x | x | x |
| <b>11-2796</b> | Kentucky | 7 | 11 | >256 | 8   | Ser83-Phe / Asp87-Tyr | / | The57-Ser / Ser80-Ile | x | x | x | x | x | x |

|                |          |   |    |      |      |                       |   |                       |   |       |   |      |   |   |
|----------------|----------|---|----|------|------|-----------------------|---|-----------------------|---|-------|---|------|---|---|
| <b>11-4453</b> | Kentucky | 7 | 10 | >256 | 8    | Ser83-Phe / Asp87-Tyr | / | The57-Ser / Ser80-Ile | x | x     | x | x    | x | x |
| <b>12-1944</b> | Kentucky | 7 | 11 | >256 | >32  | Ser83-Phe / Asp87-Asn | / | Thr57-Ser / Ser80-Ile | x | x     | x | x    | x |   |
| <b>12-1946</b> | Kentucky | 7 | 7  | >256 | 16   | Ser83-Phe / Asp87-Asn | / | Thr57-Ser / Ser80-Ile | x | x     | x | x    | x |   |
| <b>12-1702</b> | Kentucky | 7 | 23 | >256 | 0.19 | Asp87-Asn             | / | Thr57-Ser             | x | x     | x | x    | x |   |
| <b>12-3477</b> | Kentucky | 7 | 12 | >256 | 32   | Ser83-Phe / Asp87-Tyr | / | Thr57-Ser / Ser80-Ile | x | QnrB1 | x | x    | x |   |
| <b>12-1892</b> | Kentucky | 7 | 10 | >256 | 24   | Ser83-Phe / Asp87-Asn | / | Thr57-Ser / Ser80-Ile | x | x     | x | x    | x |   |
| <b>12-2259</b> | Kentucky | 7 | 7  | >256 | >32  | Ser83-Phe / Asp87-Asn | / | Thr57-Ser / Ser80-Ile | x | x     | x | x    | x |   |
| <b>12-0464</b> | Kentucky | 7 | 12 | >256 | 32   | Ser83-Phe / Asp87-Asn | / | Thr57-Ser / Ser80-Ile | x | x     | x | x    | x |   |
| <b>12-0590</b> | Kentucky | 7 | 12 | >256 | 8    | Ser83-Phe / Asp87-Asn | / | Thr57-Ser / Ser80-Ile | x | x     | x | x    | x |   |
| <b>12-2493</b> | Kentucky | 7 | 11 | >256 | 32   | Ser83-Phe / Asp87-Gly | / | Thr57-Ser / Ser80-Ile | x | x     | x | x    | x |   |
| <b>12-3585</b> | Kentucky | 7 | 11 | >256 | 16   | Ser83-Phe / Asp87-Asn | / | Thr57-Ser / Ser80-Ile | x | x     | x | x    | x |   |
| <b>12-0433</b> | Kentucky | 7 | 12 | >256 | 16   | Ser83-Phe / Asp87-Asn | / | Thr57-Ser / Ser80-Ile | x | x     | x | x    | x |   |
| <b>12-1244</b> | Kentucky | 7 | 12 | >256 | 32   | Ser83-Phe / Asp87-Tyr | / | Thr57-Ser / Ser80-Ile | x | x     | x | x    | x |   |
| <b>12-2458</b> | Kentucky | 7 | 11 | >256 | 16   | Ser83-Phe / Asp87-Asn | / | Thr57-Ser / Ser80-Ile | x | x     | x | x    | x |   |
| <b>12-2758</b> | Kentucky | 7 | 7  | >256 | 16   | Ser83-Phe / Asp87-Tyr | / | Thr57-Ser / Ser80-Ile | x | x     | x | x    | x |   |
| <b>12-3007</b> | Kentucky | 7 | 11 | >256 | 16   | Ser83-Phe / Asp87-Tyr | / | Thr57-Ser / Ser80-Ile | x | x     | x | x    | x |   |
| <b>12-3577</b> | Kentucky | 7 | 12 | >256 | 24   | Ser83-Phe / Asp87-Asn | / | Thr57-Ser / Ser80-Ile | x | x     | x | QnrD | x |   |
| <b>12-0434</b> | Kentucky | 7 | 11 | >256 | 32   | Ser83-Phe / Asp87-Asn | / | Thr57-Ser / Ser80-Ile | x | x     | x | x    | x |   |
| <b>12-0106</b> | Kentucky | 7 | 13 | >256 | 16   | Ser83-Phe / Asp87-Leu | / | Thr57-Ser / Ser80-Ile | x | x     | x | x    | x |   |
| <b>12-0726</b> | Kentucky | 7 | 12 | >256 | 16   | Ser83-Phe / Asp87-Asn | / | Thr57-Ser / Ser80-Ile | x | x     | x | x    | x |   |
| <b>12-1206</b> | Kentucky | 7 | 12 | >256 | 24   | Ser83-Phe / Asp87-Asn | / | Thr57-Ser / Ser80-Ile | x | x     | x | x    | x |   |

|                   |          |    |    |    |       |                       |   | Ser80-Ile             |   |       |   |      |   |
|-------------------|----------|----|----|----|-------|-----------------------|---|-----------------------|---|-------|---|------|---|
| <b>12-2447</b>    | Kentucky | 14 | 22 | 16 | 0.25  | /                     | / | Thr57-Ser             | x | QnrB1 | x | QnrD | x |
| <b>12-2428</b>    | Kentucky | 24 | 28 | 12 | 0.064 | /                     | / | Thr57-Ser             | x | x     | x | QnrD | x |
| <b>S13BD01303</b> | KENTUCKY | 7  | 7  |    |       | Ser83-Phe / Asp87-Tyr | / | Thr57-Ser / Ser80-Ile | x | x     | x | x    | x |
| <b>S13BD01174</b> | KENTUCKY | 7  | 10 |    |       |                       | / | Thr57-Ser / Ser80-Ile | x | x     | x | x    | x |
| <b>S13BD01021</b> | KENTUCKY | 7  | 11 |    |       | Ser83-Phe, Asp87-Gly  |   | Thr57-Ser, Ser80-Ile  | x | x     | x | x    | x |
| <b>S13BD01007</b> | KENTUCKY | 7  | 10 |    |       | Ser83-Phe, Asp87-Tyr  |   | Thr57-Ser, Ser80-Ile  | x | x     | x | x    | x |
| <b>S13BD00968</b> | KENTUCKY | 7  | 10 |    |       | Ser83-Phe, Asp87-Tyr  |   | Thr57-Ser, Ser80-Ile  | x | x     | x | x    | x |
| <b>S13BD01059</b> | KENTUCKY | 7  | 11 |    |       | Ser83-Phe, Asp87-Tyr  |   | Thr57-Ser, Ser80-Ile  | x | x     | x | x    | x |
| <b>S13BD00344</b> | KENTUCKY | 7  | 10 |    |       | Ser83-Phe, Asp87-Tyr  |   | Thr57-Ser, Ser80-Ile  | x | x     | x | x    | x |
| <b>S13BD00123</b> | KENTUCKY | 7  | 11 |    |       |                       |   |                       | x | x     | x | x    | x |
| <b>S13BD00442</b> | KENTUCKY | 7  | 12 |    |       | Ser83-Phe, Asp87-Tyr  |   | Thr57-Ser, Ser80-Ile  | x | x     | x | x    | x |
| <b>S13BD00714</b> | KENTUCKY | 7  | 10 |    |       | Ser83-Phe, Asp87-Asn  |   | Thr57-Ser, Ser80-Ile  | x | x     | x | x    | x |
| <b>S13BD00605</b> | KENTUCKY | 7  | 12 |    |       | Ser83-Phe, Asp87-Tyr  |   | Thr57-Ser, Ser80-Ile  | x | x     | x | x    | x |
| <b>S13BD00670</b> | KENTUCKY | 7  | 10 |    |       | Ser83-Phe, Asp87-Asn  |   | Thr57-Ser, Ser80-Ile  | x | x     | x | x    | x |
| <b>S13BD00145</b> | KENTUCKY | 7  | 11 |    |       | Ser83-Phe, Asp87-Tyr  | / | Thr57-Ser, Ser80-Ile  | x | x     | x | x    | x |
| <b>S13BD00644</b> | KENTUCKY | 7  | 10 |    |       | Ser83-Phe, Asp87-Asn  |   | Thr57-Ser, Ser80-Ile  | x | x     | x | x    | x |
| <b>S13BD00254</b> | KENTUCKY | 7  | 9  |    |       | Ser83-Phe, Asp87-Tyr  |   | Thr57-Ser, Ser80-Ile  | x | x     | x | x    | x |
| <b>S13BD00534</b> | KENTUCKY | 7  | 13 |    |       | Ser83-Phe, Asp87-Tyr  |   | Thr57-Ser, Ser80-Ile  | x | x     | x | x    | x |
| <b>09-02825</b>   | Kentucky | 7  | 7  |    |       | Ser83-Phe / Asp87-Asn | / | Thr57-Ser / Ser80-Ile | x | x     | x | x    | x |
| <b>09-00541</b>   | Kentucky | 7  | 9  |    |       | Ser83-Phe / Asp87-Tyr | / | Thr57-Ser / Ser80-Ile | x | x     | x | x    | x |
| <b>09-01090</b>   | Kentucky | 7  | 7  |    |       | Ser83-Phe / Asp87-Asn | / | Thr57-Ser /           |   |       |   |      |   |

|          |          |   |    |       |    |                       |   |  |  |                       |   |   |   |   |   |   |  |  |  |
|----------|----------|---|----|-------|----|-----------------------|---|--|--|-----------------------|---|---|---|---|---|---|--|--|--|
|          |          |   |    |       |    |                       |   |  |  | Ser80-Ile             |   |   |   |   |   |   |  |  |  |
| 09-03735 | Kentucky | 7 | 10 |       |    | Ser83-Phe / Asp87-Asn | / |  |  | Thr57-Ser / Ser80-Ile |   |   |   |   |   |   |  |  |  |
| 09-01288 | Kentucky | 7 | 7  |       |    | Ser83-Phe / Asp87-Asn | / |  |  | Thr57-Ser / Ser80-Ile |   |   |   |   |   |   |  |  |  |
| 09-02322 | Kentucky | 7 | 10 |       |    | Ser83-Phe / Asp87-Gly | / |  |  | Thr57-Ser / Ser80-Ile |   |   |   |   |   |   |  |  |  |
| 09-02595 | Kentucky | 7 | 7  |       |    |                       |   |  |  |                       |   |   |   |   |   |   |  |  |  |
| 09-02982 | Kentucky | 7 | 9  |       |    | Ser83-Phe / Asp87-Asn | / |  |  | Thr57-Ser / Ser80-Ile |   |   |   |   |   |   |  |  |  |
| 09-03867 | Kentucky | 7 | 10 |       |    | /                     | / |  |  | Thr57-Ser / Ser80-Ile |   |   |   |   |   |   |  |  |  |
| 09-01341 | Kentucky | 7 | 7  | > 256 | 16 | Ser83-Phe / Asp87-Asn | / |  |  | Thr57-Ser / Ser80-Ile |   |   |   |   |   |   |  |  |  |
| 09-02454 | Kentucky | 7 | 10 |       |    | Ser83-Phe / Asp87-Tyr | / |  |  | Thr57-Ser / Ser80-Ile | x | x | x | x | x |   |  |  |  |
| 09-03800 | Kentucky | 7 | 10 | > 256 | 16 | Ser83-Phe / Asp87-Asn | / |  |  | Thr57-Ser / Ser80-Ile |   |   |   |   |   |   |  |  |  |
| 09-03455 | Kentucky | 7 | 9  |       |    | Ser83-Phe / Asp87-Asn | / |  |  | Thr57-Ser / Ser80-Ile |   |   |   |   |   |   |  |  |  |
| 09-03913 | Kentucky | 7 | 10 | > 256 | 16 | Ser83-Phe / Asp87-Asn | / |  |  | Thr57-Ser / Ser80-Ile |   |   |   |   |   |   |  |  |  |
| 10-03827 | Kentucky | 7 | 7  |       |    |                       |   |  |  |                       |   |   |   |   |   |   |  |  |  |
| 10-04294 | Kentucky | 7 | 7  |       |    | Ser83-Phe / Asp87-Asn | / |  |  | Thr57-Ser / Ser80-Ile |   |   |   |   |   |   |  |  |  |
| 10-00860 | Kentucky | 7 | 9  |       |    | Ser83-Phe / Asp87-Asn | / |  |  | Thr57-Ser / Ser80-Ile |   |   |   |   |   |   |  |  |  |
| 10-00865 | Kentucky | 7 | 9  |       |    | Ser83-Phe / Asp87-Asn | / |  |  | Thr57-Ser / Ser80-Ile |   |   |   |   |   |   |  |  |  |
| 10-03585 | Kentucky | 7 | 10 |       |    | Ser83-Phe / Asp87-Asn | / |  |  | Thr57-Ser / Ser80-Ile |   |   |   |   |   |   |  |  |  |
| 10-03795 | Kentucky | 7 | 10 |       |    | Ser83-Phe / Asp87-Asn | / |  |  | Thr57-Ser / Ser80-Ile |   |   |   |   |   |   |  |  |  |
| 10-05568 | Kentucky | 7 | 11 |       |    |                       |   |  |  |                       |   |   |   |   |   |   |  |  |  |
| 12-4130  | Kentucky | 7 | 11 |       |    | Ser83-Phe / Asp87-Asn | / |  |  | Thr57-Ser / Ser80-Ile | x | x | x | x | x | x |  |  |  |
| 12-0575  | Kentucky | 7 | 11 |       |    |                       |   |  |  |                       | x | x | x | x | x | x |  |  |  |
| 12-4685  | Kentucky | 7 | 11 |       |    |                       |   |  |  |                       | x | x | x | x | x | x |  |  |  |

|                   |          |   |    |                       |   |                       |  |   |   |   |   |   |   |
|-------------------|----------|---|----|-----------------------|---|-----------------------|--|---|---|---|---|---|---|
| <b>12-4901</b>    | Kentucky | 7 | 11 |                       |   |                       |  | X | X | X | X | X | X |
| <b>12-3804</b>    | Kentucky | 7 | 14 |                       |   |                       |  | X | X | X | X | X | X |
| <b>12-3908</b>    | Kentucky | 7 | 12 |                       |   |                       |  | X | X | X | X | X | X |
| <b>12-4420</b>    | Kentucky | 7 | 11 |                       |   |                       |  | X | X | X | X | X | X |
| <b>12-4714</b>    | Kentucky | 7 | 11 |                       |   |                       |  | X | X | X | X | X | X |
| <b>12-4016</b>    | Kentucky | 7 | 12 |                       |   |                       |  | X | X | X | X | X | X |
| <b>12-3855</b>    | Kentucky | 7 | 12 |                       |   |                       |  | X | X | X | X | X | X |
| <b>12-3835</b>    | Kentucky | 7 | 12 |                       |   |                       |  | X | X | X | X | X | X |
| <b>12-3912</b>    | Kentucky | 7 | 13 |                       |   |                       |  | X | X | X | X | X | X |
| <b>12-4120</b>    | Kentucky | 7 | 12 |                       |   |                       |  | X | X | X | X | X | X |
| <b>12-4671</b>    | Kentucky | 7 | 11 |                       |   |                       |  | X | X | X | X | X | X |
| <b>S13BD02611</b> | KENTUCKY | 7 | 11 |                       |   |                       |  | X | X | X | X | X | X |
| <b>S13BD04007</b> | KENTUCKY | 7 | 11 | Ser83-Phe / Asp87-Asn | / | Thr57-Ser / Ser80-Ile |  | X | X | X | X | X | X |
| <b>S13BD04130</b> | KENTUCKY | 7 | 10 |                       |   |                       |  | X | X | X | X | X | X |
| <b>S13BD03831</b> | KENTUCKY | 7 | 11 | Ser83-Phe / Asp87-Asn | / | Thr57-Ser / Ser80-Ile |  | X | X | X | X | X | X |
| <b>S13BD02185</b> | KENTUCKY | 7 | 12 | Ser83-Phe / Asp87-Tyr | / | Thr57-Ser / Ser80-Ile |  | X | X | X | X | X | X |
| <b>S13BD03185</b> | KENTUCKY | 7 | 7  |                       |   |                       |  | X | X | X | X | X | X |
| <b>S13BD03303</b> | KENTUCKY | 7 | 10 |                       |   |                       |  | X | X | X | X | X | X |
| <b>S13BD03297</b> | KENTUCKY | 7 | 7  |                       |   |                       |  | X | X | X | X | X | X |
| <b>S13BD03353</b> | KENTUCKY | 7 | 10 |                       |   |                       |  | X | X | X | X | X | X |
| <b>S13BD01311</b> | KENTUCKY | 7 | 7  | Ser83-Phe / Asp87-Gly | / | Thr57-Ser / Ser80-Ile |  | X | X | X | X | X | X |
| <b>S13BD02963</b> | KENTUCKY | 7 | 9  |                       |   |                       |  | X | X | X | X | X | X |
| <b>S13BD01823</b> | KENTUCKY | 7 | 11 |                       |   |                       |  | X | X | X | X | X | X |
| <b>S13BD03937</b> | KENTUCKY | 7 | 9  |                       |   |                       |  | X | X | X | X | X | X |
| <b>S13BD03351</b> | KENTUCKY | 7 | 10 |                       |   |                       |  | X | X | X | X | X | X |
| <b>S13BD02775</b> | KENTUCKY | 7 | 11 |                       |   |                       |  | X | X | X | X | X | X |
| <b>S13BD01886</b> | KENTUCKY | 7 | 11 |                       |   |                       |  | X | X | X | X | X | X |
| <b>S13BD01392</b> | KENTUCKY | 7 | 9  | Ser83-Phe / Asp87-Tyr | / | Thr57-Ser / Ser80-Ile |  | X | X | X | X | X | X |

|                   |                                             |    |    |       |       |                       |   |                       |   |   |   |   |       |   |
|-------------------|---------------------------------------------|----|----|-------|-------|-----------------------|---|-----------------------|---|---|---|---|-------|---|
| <b>S13BD01383</b> | KENTUCKY                                    | 7  | 11 |       |       | Ser83-Phe / Asp87-Tyr | / | Thr57-Ser / Ser80-Ile | x | x | x | x | x     | x |
| <b>S13BD01636</b> | KENTUCKY                                    | 7  | 9  |       |       | Ser83-Phe / Asp87-Asn | / | Thr57-Ser / Ser80-Ile | x | x | x | x | x     | x |
| <b>S13BD04413</b> | KENTUCKY                                    | 7  | 11 |       |       |                       |   |                       | x | x | x | x | x     | x |
| <b>S13BD02873</b> | KENTUCKY                                    | 7  | 11 |       |       |                       |   |                       | x | x | x | x | x     | x |
| <b>S13BD02807</b> | KENTUCKY                                    | 7  | 11 |       |       |                       |   |                       | x | x | x | x | x     | x |
| <b>S13BD04304</b> | KENTUCKY                                    | 7  | 9  |       |       |                       |   |                       | x | x | x | x | x     | x |
| <b>S13BD02505</b> | KENTUCKY                                    | 7  | 11 |       |       |                       |   |                       | x | x | x | x | x     | x |
| <b>S13BD02738</b> | KENTUCKY                                    | 7  | 10 |       |       |                       |   |                       | x | x | x | x | x     | x |
| <b>S13BD04229</b> | KENTUCKY                                    | 7  | 11 |       |       |                       |   |                       | x | x | x | x | x     | x |
| <b>S13BD04371</b> | KENTUCKY                                    | 7  | 10 |       |       |                       |   |                       | x | x | x | x | x     | x |
| <b>S13BD01432</b> | KENTUCKY                                    | 7  | 11 |       |       | Ser83-Phe / Asp87-Tyr | / | Thr57-Ser / Ser80-Ile | x | x | x | x | x     | x |
| <b>S13BD02333</b> | KENTUCKY                                    | 7  | 11 |       |       |                       |   |                       | x | x | x | x | x     | x |
| <b>S13BD01978</b> | KENTUCKY                                    | 7  | 11 |       |       |                       |   |                       | x | x | x | x | x     | x |
| <b>S14BD00059</b> | KENTUCKY                                    | 7  | 12 |       |       |                       |   |                       | x | x | x | x | x     | x |
| <b>S13BD02559</b> | KENTUCKY                                    | 7  | 11 |       |       |                       |   |                       | x | x | x | x | x     | x |
| <b>S13BD01514</b> | KENTUCKY                                    | 7  | 9  |       |       | Ser83-Phe / Asp87-Asn | / | Thr57-Ser / Ser80-Ile | x | x | x | x | x     | x |
| <b>S13BD02338</b> | KENTUCKY                                    | 7  | 11 |       |       |                       |   |                       | x | x | x | x | x     | x |
| <b>S13BD02132</b> | KENTUCKY                                    | 7  | 7  |       |       |                       |   |                       | x | x | x | x | x     | x |
| <b>S13BD02973</b> | MONOPHASIC<br>TYPHIMURIUM<br>1.4.[5].12:I:- | 7  | 25 |       |       |                       |   |                       | x | x | x | x | x     | x |
| <b>10-05266</b>   | Newport                                     | 7  | 25 | > 256 | 0.125 | /                     |   | Thr57-Ser             | x | x | x | x | x     | x |
| <b>10-01432</b>   | Newport                                     | 7  | 26 | > 256 | 0.094 | Asp87-Gly             | / | Thr57-Ser             | x | x | x | x | x     | x |
| <b>10-05015</b>   | Newport                                     | 7  | 26 | > 256 | 0.094 | /                     |   | Thr57-Ser             | x | x | x | x | x     | x |
| <b>10-05267</b>   | Newport                                     | 7  | 27 | > 256 | 0.94  | /                     |   | Thr57-Ser             | x | x | x | x | x     | x |
| <b>10-01547</b>   | Newport                                     | 7  | 27 | > 256 | 0.19  | Ser83-Phe             | / | Thr57-Ser             | x | x | x | x | x     | x |
| <b>10-05564</b>   | Newport                                     | 7  | 27 | > 256 | 0.25  | Ser83-Phe / Asp87-Asn |   | Thr57-Ser             | x | x | x | x | x     | x |
| <b>11-1224</b>    | Newport                                     | 7  | 21 | >256  | 0.25  | Ser83-Phe             | / | The57-Ser             | x | x | x | x | x     | x |
| <b>11-4818</b>    | Newport                                     | 13 | 29 | >256  | 0.25  | /                     | / | The57-Ser             | x | x | x | x | QnrS1 | x |





|            |                                       |   |    |       |       |           |   |           |   |   |   |   |   |   |
|------------|---------------------------------------|---|----|-------|-------|-----------|---|-----------|---|---|---|---|---|---|
| 09-00832   | Paratyphi B                           | 7 | 25 |       |       |           |   |           | x | x | x | x | x | x |
| 09-02327   | Paratyphi B                           | 7 | 25 |       |       | /         | / |           |   |   |   |   |   |   |
| 09-00775   | Paratyphi B                           | 7 | 20 |       |       |           |   |           |   |   |   |   |   |   |
| 09-02080   | Paratyphi B                           | 7 | 24 |       |       | /         | / | /         | x | x | x | x | x | x |
| 09-02510   | Paratyphi B                           | 7 | 23 |       |       |           |   |           |   |   |   |   |   |   |
| 09-01163   | Paratyphi B                           | 7 | 23 |       |       |           |   |           |   |   |   |   |   |   |
| 09-01654   | Paratyphi B                           | 7 | 24 | > 256 | 0,25  | Ser83-Phe | / | /         |   |   |   |   |   |   |
| 09-01315   | Paratyphi B                           | 7 | 25 | > 256 | 0,125 | Asp87-Tyr | / | /         |   |   |   |   |   |   |
| 09-02822   | Paratyphi B                           | 7 | 28 |       |       | Asp87-Tyr | / | /         |   |   |   |   |   |   |
| S13BD03047 | PARATYPHI B<br>VAR. L(+)<br>TARTRATE+ | 7 | 21 |       |       | Asp87-Tyr | / |           | x | x | x | x | x | x |
| S13BD04078 | PARATYPHI B<br>VAR. L(+)<br>TARTRATE+ | 7 | 26 |       |       | Asp87-Gly | / | /         | x | x | x | x | x | x |
| S13BD02529 | PARATYPHI B<br>VAR. L(+)<br>TARTRATE+ | 7 | 28 |       |       | Ser83-Tyr | / | /         | x | x | x | x | x | x |
| S13BD01852 | PARATYPHI B<br>VAR. L(+)<br>TARTRATE+ | 7 | 25 |       |       | Ser83-Phe | / | /         | x | x | x | x | x | x |
| 12-0923    | Paratyphi B<br>var.Java               | 7 | 22 |       |       | Asp87-Gly | / | /         | x | x | x | x | x | x |
| 12-0617    | Paratyphi B<br>var.Java               | 7 | 21 |       |       | Ser83-Phe | / | /         | x | x | x | x | x | x |
| 12-1485    | Paratyphi B<br>var.Java               | 7 | 25 |       |       | Asp87-Gly | / | /         | x | x | x | x | x | x |
| 10-03432   | Paratyphi C                           | 7 | 29 |       |       |           |   |           |   |   |   |   |   |   |
| 11-2820    | Schwarzengrund                        | 7 | 25 |       |       |           |   |           | x | x | x | x | x | x |
| S13BD00360 | STANLEY                               | 7 | 23 |       |       | Asp87-Tyr | / | The57-Ser | x | x | x | x | x | x |
| S13BD00293 | STANLEY                               | 7 | 24 |       |       |           |   |           | x | x | x | x | x | x |
| S13BD00779 | STANLEY                               | 7 | 24 |       |       | Asp87-Tyr | / | The57-Ser | x | x | x | x | x | x |
| S13BD01154 | STANLEY                               | 7 | 24 |       |       | Asp87-Tyr | / | The57-Ser | x | x | x | x | x | x |
| S13BD00396 | STANLEY                               | 7 | 21 |       |       | Asp87-Tyr | / | The57-Ser | x | x | x | x | x | x |

|          |       |   |    |       |       |   |                                       |                |           |   |   |   |   |       |   |
|----------|-------|---|----|-------|-------|---|---------------------------------------|----------------|-----------|---|---|---|---|-------|---|
| 09-03520 | Typhi | 7 | 15 | > 256 | 2     | l | Ser83-Tyr / Glu133-Gly                | /              | /         | x | x | x | x | QnrS1 | x |
| 10-02558 | Typhi | 7 | 20 | > 256 | 0.5   |   | Ser83-Tyr                             | /              | /         | x | x | x | x | x     | x |
| 10-04077 | Typhi | 7 | 21 | > 256 | 10    |   | Ser83-Phe                             | /              | /         | x | x | x | x | x     | x |
| 10-00423 | Typhi | 7 | 21 | > 256 | 0.25  |   | Ser83-Phe / Asp87-Asn                 | /              | Ser80-Ile | x | x | x | x | x     | x |
| 10-00779 | Typhi | 7 | 23 | > 256 | 0.38  |   | Ser83-Phe / Glu133-Gly                | Ala57<br>4-Val | /         | x | x | x | x | x     | x |
| 10-00783 | Typhi | 7 | 23 | > 256 | 0.38  |   | Ser83-Phe / Asp87-Asn                 | /              | Ser80-Ile | x | x | x | x | x     | x |
| 10-05179 | Typhi | 7 | 25 | > 256 | 0.25  |   | Ser83-Phe                             | /              | /         | x | x | x | x | x     | x |
| 10-05284 | Typhi | 7 | 25 | > 256 | 0.25  |   | Ser83-Phe                             | /              | /         | x | x | x | x | x     | x |
| 10-00017 | Typhi | 7 | 27 | 12    | 0.032 |   | /                                     | /              | /         | x | x | x | x | x     | x |
| 11-3720  | Typhi | 7 | 24 | >256  | 0.38  |   | Ser83-Phe                             | /              | /         | x | x | x | x | x     | x |
| 11-4624  | Typhi | 7 | 22 | >256  | 0.5   |   | Ser83-Leu                             | /              | /         | x | x | x | x | x     | x |
| 11-4623  | Typhi | 7 | 21 | >256  | 0.38  |   | Ser83-Leu                             | /              | /         | x | x | x | x | x     | x |
| 11-0629  | Typhi | 7 | 7  | >256  | >32   |   | Ser83-Phe / Asp87-Asn                 | /              | Ser80-Ile | x | x | x | x | x     | x |
| 11-1028  | Typhi | 7 | 24 | >256  | 0.38  |   | Ser83-Tyr                             | /              | /         | x | x | x | x | x     | x |
| 11-2205  | Typhi | 7 | 23 | >256  | 0.38  |   | Ser83-Tyr                             | /              | /         | x | x | x | x | x     | x |
| 11-0020  | Typhi | 7 | 26 | >256  | 0.19  |   | Ser83-Phe                             | /              | /         | x | x | x | x | x     | x |
| 11-2823  | Typhi | 7 | 24 | >256  | 0.38  |   | Ser83-Phe                             | /              | /         | x | x | x | x | x     | x |
| 11-3756  | Typhi | 7 | 24 | >256  | 0.38  |   | Ser83-Phe                             | /              | /         | x | x | x | x | x     | x |
| 11-3151  | Typhi | 7 | 25 | >256  | 0.75  |   | Ser83-Phe                             | /              | The57-Ser | x | x | x | x | x     | x |
| 11-3798  | Typhi | 7 | 16 | >256  | 3     |   | Asp87-Tyr                             | /              | /         | x | x | x | x | QnrS1 | x |
| 09-03299 | Typhi | 7 | 23 |       |       |   | Ser83-Phe / Glu133-Gly                | /              | /         |   |   |   |   |       |   |
| 09-01674 | Typhi | 7 | 29 |       |       |   | Glu133-Gly                            | /              | /         |   |   |   |   |       |   |
| 09-03654 | Typhi | 7 | 15 |       |       |   | Ser83-Tyr / Glu133-Gly                | /              | /         |   |   |   |   |       |   |
| 09-04716 | Typhi | 7 | 23 |       |       |   | Ser83-Phe                             | /              | /         |   |   |   |   |       |   |
| 09-01796 | Typhi | 7 | 25 |       |       |   | Glu133-Gly                            | /              | /         |   |   |   |   |       |   |
| 09-01876 | Typhi | 7 | 26 |       |       |   | Glu133-Gly                            | /              | /         |   |   |   |   |       |   |
| 09-01904 | Typhi | 7 | 22 |       |       |   |                                       |                |           |   |   |   |   |       |   |
| 09-02031 | Typhi | 7 | 7  |       |       |   | Ser83-Phe / Asp87-Asn /<br>Glu133-Gly | /              | Ser80-Ile |   |   |   |   |       |   |
| 09-02066 | Typhi | 7 | 23 |       |       |   |                                       |                |           |   |   |   |   |       |   |
| 09-03381 | Typhi | 7 | 22 |       |       |   | Glu133-Gly                            | /              | /         |   |   |   |   |       |   |

|            |             |   |    |       |      |                        |   |             |   |   |   |   |   |   |   |  |  |  |  |
|------------|-------------|---|----|-------|------|------------------------|---|-------------|---|---|---|---|---|---|---|--|--|--|--|
| 09-03826   | Typhi       | 7 | 23 |       |      |                        |   |             |   |   |   |   |   |   |   |  |  |  |  |
| 09-03205   | Typhi       | 7 | 24 | > 256 | 0,25 | Ser83-Phe / Glu133-Gly | / | /           |   |   |   |   |   |   |   |  |  |  |  |
| 09-01345   | Typhi       | 7 | 11 |       |      | Ser83-Phe / Asp87-Asn  | / | Ser80-Ile   |   |   |   |   |   |   |   |  |  |  |  |
| 10-00424   | Typhi       | 7 | 21 | > 256 | 0,25 | Ser83-Phe / Glu133-Gly | / | /           |   |   |   |   |   |   |   |  |  |  |  |
| 10-00135   | Typhi       | 7 | 22 |       |      | Ser83-Tyr / Glu133-Gly | / | /           |   |   |   |   |   |   |   |  |  |  |  |
| 10-00390   | Typhi       | 7 | 22 |       |      | Ser83-Phe / Glu133-Gly | / | /           |   |   |   |   |   |   |   |  |  |  |  |
| 10-00879   | Typhi       | 7 | 22 |       |      | Ser83-Phe / Glu133-Gly | / | /           |   |   |   |   |   |   |   |  |  |  |  |
| 10-01414   | Typhi       | 7 | 22 |       |      | Ser83-Phe / Glu133-Gly | / | /           | x | x | x | x | x | x | x |  |  |  |  |
| 10-03592   | Typhi       | 7 | 23 |       |      | Ser83-Phe / Glu133-Gly | / | /           |   |   |   |   |   |   |   |  |  |  |  |
| 10-04488   | Typhi       | 7 | 23 |       |      |                        |   |             |   |   |   |   |   |   |   |  |  |  |  |
| 10-01788   | Typhi       | 7 | 23 |       |      | Ser83-Tyr / Glu133-Gly | / | /           |   |   |   |   |   |   |   |  |  |  |  |
| 10-01747   | Typhi       | 7 | 23 |       |      | Ser83-Phe / Glu133-Gly | / | /           |   |   |   |   |   |   |   |  |  |  |  |
| 10-00714   | Typhi       | 7 | 23 |       |      | Ser83-Phe / Glu133-Gly | / | /           |   |   |   |   |   |   |   |  |  |  |  |
| 10-02140   | Typhi       | 7 | 23 |       |      | Ser83-Phe / Glu133-Gly | / | /           |   |   |   |   |   |   |   |  |  |  |  |
| 10-00616   | Typhi       | 7 | 26 |       |      | Ser83-Phe / Glu133-Gly | / | /           |   |   |   |   |   |   |   |  |  |  |  |
| 10-02253   | Typhi       | 7 | 27 |       |      | Asp87-Asn / Glu133-Gly | / | /           |   |   |   |   |   |   |   |  |  |  |  |
| 10-05279   | Typhi       | 7 | 32 |       |      |                        |   |             |   |   |   |   |   |   |   |  |  |  |  |
| 12-3453    | Typhi       | 7 | 22 |       |      |                        |   |             | x | x | x | x | x | x | x |  |  |  |  |
| 12-0404    | Typhi       | 7 | 31 |       |      |                        |   |             | x | x | x | x | x | x | x |  |  |  |  |
| 12-0759    | Typhi       | 7 | 9  |       |      |                        |   |             | x | x | x | x | x | x | x |  |  |  |  |
| 12-3287    | Typhi       | 7 | 24 |       |      |                        |   |             | x | x | x | x | x | x | x |  |  |  |  |
| 12-3086    | Typhi       | 7 | 29 |       |      |                        |   |             | x | x | x | x | x | x | x |  |  |  |  |
| 12-4498    | Typhi       | 7 | 23 |       |      |                        |   |             | x | x | x | x | x | x | x |  |  |  |  |
| 12-3666    | Typhi       | 7 | 29 |       |      |                        |   |             | x | x | x | x | x | x | x |  |  |  |  |
| S13BD01103 | TYPHI       | 7 | 26 |       |      |                        |   |             | x | x | x | x | x | x | x |  |  |  |  |
| S13BD03481 | TYPHI       | 7 | 23 |       |      |                        |   |             | x | x | x | x | x | x | x |  |  |  |  |
| S14BD00076 | TYPHI       | 7 | 23 |       |      |                        |   |             | x | x | x | x | x | x | x |  |  |  |  |
| S13BD00683 | TYPHI       | 7 | 24 |       |      |                        |   |             | x | x | x | x | x | x | x |  |  |  |  |
| S13BD02880 | TYPHI       | 7 | 23 |       |      |                        |   |             | x | x | x | x | x | x | x |  |  |  |  |
| 10-03081   | Typhimurium | 7 | 9  | > 256 | 12   | Ser83-Phe / Asp87-Asn  | / | Ser80-Arg   | x | x | x | x | x | x | x |  |  |  |  |
| 10-04600   | Typhimurium | 7 | 24 | > 256 | 0.19 | Ser83-Phe / Asp87-Asn  | / | Thr57-Ser / | x | x | x | x | x | x | x |  |  |  |  |

|          |             |   |    |       |       |                        |   |                       |   |   | Ser80-Ile |   |   |   |  |
|----------|-------------|---|----|-------|-------|------------------------|---|-----------------------|---|---|-----------|---|---|---|--|
| 10-04857 | Typhimurium | 7 | 24 | > 256 | 0.125 | Ser83-Phe / Glu133-Gly | / | /                     | x | x | x         | x | x | x |  |
| 10-01783 | Typhimurium | 7 | 24 | > 256 | 0.19  | Asp87-Asn              | / | /                     | x | x | x         | x | x | x |  |
| 10-02407 | Typhimurium | 7 | 24 | > 256 | 0.125 | Asp87-Asn              | / | /                     | x | x | x         | x | x | x |  |
| 10-04105 | Typhimurium | 7 | 24 | > 256 | 0.19  | Ser83-Phe / Asp87-Tyr  | / | Thr57-Ser / Ser80-Ile | x | x | x         | x | x | x |  |
| 10-04107 | Typhimurium | 7 | 24 | > 256 | 0.125 | Asp87-Asn              | / | /                     | x | x | x         | x | x | x |  |
| 10-03944 | Typhimurium | 7 | 24 | > 256 | 0.19  | Asp87-Asn              | / | /                     | x | x | x         | x | x | x |  |
| 10-02666 | Typhimurium | 7 | 24 | > 256 | 0.38  | Ser83-Phe              | / | /                     | x | x | x         | x | x | x |  |
| 10-04971 | Typhimurium | 7 | 25 | > 256 | 0.19  | Ser83-Phe / Asp87-Asn  | / | Thr57-Ser / Ser80-Ile | x | x | x         | x | x | x |  |
| 10-04082 | Typhimurium | 7 | 25 | > 256 | 0.125 | Asp87-Asn              | / | /                     | x | x | x         | x | x | x |  |
| 10-04628 | Typhimurium | 7 | 25 | > 256 | 0.19  | Ser83-Phe / Asp87-Asn  | / | Thr57-Ser / Ser80-Ile | x | x | x         | x | x | x |  |
| 10-03902 | Typhimurium | 7 | 25 | > 256 | 0.19  | Asp87-Asn              | / | /                     | x | x | x         | x | x | x |  |
| 10-02560 | Typhimurium | 7 | 25 | > 256 | 0.094 | Asp87-Asn              | / | /                     | x | x | x         | x | x | x |  |
| 10-04439 | Typhimurium | 7 | 26 | > 256 | 0.19  | /                      | / | Thr57-Ser             | x | x | x         | x | x | x |  |
| 10-03872 | Typhimurium | 7 | 26 | > 256 | 0.19  | Asp87-Asn              | / | /                     | x | x | x         | x | x | x |  |
| 10-04398 | Typhimurium | 7 | 28 | > 256 | 0.19  | Ser83-Phe              | / | /                     | x | x | x         | x | x | x |  |
| 11-0699  | Typhimurium | 7 | 30 | 8     | 0.023 |                        | / |                       | x | x | x         | x | x | x |  |
| 11-3330  | Typhimurium | 7 | 27 | >256  | 0.19  | Asp87-Asn              | / | /                     | x | x | x         | x | x | x |  |
| 11-2789  | Typhimurium | 7 | 24 | >256  | 0.38  | Ser83-Tyr              | / | /                     | x | x | x         | x | x | x |  |
| 11-3220  | Typhimurium | 7 | 25 | >256  | 0.125 | Asp87-Gly              | / | /                     | x | x | x         | x | x | x |  |
| 11-0008  | Typhimurium | 7 | 24 | >256  | 0.19  | Asp87-Asn              | / | /                     | x | x | x         | x | x | x |  |
| 11-3709  | Typhimurium | 7 | 10 | >256  | >32   | Ser83-Phe / Asp87-Asn  | / | The57-Ser / Ser80-Ile | x | x | x         | x | x | x |  |
| 11-3729  | Typhimurium | 7 | 23 | >256  | 4     | Asp87-Tyr              | / | /                     | x | x | x         | x | x | x |  |
| 11-4775  | Typhimurium | 7 | 24 | >256  | 0.25  | Ser83-Phe              | / | /                     | x | x | x         | x | x | x |  |
| 11-2977  | Typhimurium | 7 | 26 | >256  | 0.125 | Asp87-Gly              | / | /                     | x | x | x         | x | x | x |  |
| 11-1208  | Typhimurium | 7 | 24 | >256  | 0.38  | Ser83-Tyr              | / | /                     | x | x | x         | x | x | x |  |
| 11-0587  | Typhimurium | 7 | 25 | >256  | 0.25  | Asp87-Asn              | / | /                     | x | x | x         | x | x | x |  |
| 11-1400  | Typhimurium | 7 | 26 | >256  | 0.19  | Asp87-Asn              | / | /                     | x | x | x         | x | x | x |  |
| 11-3725  | Typhimurium | 7 | 26 | >256  | 0.19  | Asp87-Asn              | / | /                     | x | x | x         | x | x | x |  |

|          |             |    |    |       |       |           |   |   |   |   |   |   |       |   |
|----------|-------------|----|----|-------|-------|-----------|---|---|---|---|---|---|-------|---|
| 11-4069  | Typhimurium | 7  | 25 | >256  | 0.125 | Asp87-Asn | / | / | x | x | x | x | x     | x |
| 11-0210  | Typhimurium | 7  | 27 | >256  | 0.19  | Asp87-Asn | / | / | x | x | x | x | x     | x |
| 11-3712  | Typhimurium | 10 | 25 | >256  | 0.38  | /         | / | / | x | x | x | x | x     | x |
| 11-3815  | Typhimurium | 11 | 25 | 64    | 0.25  | /         | / | / | x | x | x | x | x     | x |
| 11-2914  | Typhimurium | 13 | 24 | 48    | 0.5   | /         | / | / | x | x | x | x | QnrS1 | x |
| 11-3608  | Typhimurium | 14 | 23 | 48    | 0.5   | /         | / | / | x | x | x | x | x     | x |
| 11-3088  | Typhimurium | 15 | 29 | 48    | 0.64  | /         | / | / | x | x | x | x | x     | x |
| 11-3594  | Typhimurium | 15 | 22 | 32    | 0.38  | /         | / | / | x | x | x | x | x     | x |
| 09-04089 | Typhimurium | 7  | 28 | 32    | 0,016 | /         | / | / |   |   |   |   |       |   |
| 09-01503 | Typhimurium | 7  | 25 | > 256 | 0,094 | Ser83-Phe | / | / | x | x | x | x | x     | x |
| 09-01265 | Typhimurium | 7  | 28 |       |       | Asp87-Asn | / | / |   |   |   |   |       |   |
| 09-04680 | Typhimurium | 7  | 25 | > 256 | 8     | Asp87-Asn | / | / |   |   |   |   |       |   |
| 09-02182 | Typhimurium | 7  | 25 |       |       | Asp87-Asn | / | / |   |   |   |   |       |   |
| 09-02914 | Typhimurium | 7  | 26 |       |       | Ser83-Tyr | / | / | x | x | x | x | x     | x |
| 09-00086 | Typhimurium | 7  | 32 |       |       |           |   |   |   |   |   |   |       |   |
| 10-03563 | Typhimurium | 7  | 9  |       |       |           |   |   |   |   |   |   |       |   |
| 10-03921 | Typhimurium | 7  | 24 |       |       |           |   |   |   |   |   |   |       |   |
| 10-03263 | Typhimurium | 7  | 24 |       |       | Asp87-Asn | / | / |   |   |   |   |       |   |
| 10-03695 | Typhimurium | 7  | 26 |       |       | Asp87-Asn | / | / |   |   |   |   |       |   |
| 11-4576  | Typhimurium | 7  | 27 |       |       |           |   |   | x | x | x | x | x     | x |
| 12-2435  | Typhimurium | 7  | 27 |       |       |           |   |   | x | x | x | x | x     | x |
| 12-0356  | Typhimurium | 7  | 28 |       |       |           |   |   | x | x | x | x | x     | x |
| 12-4395  | Typhimurium | 7  | 23 |       |       |           |   |   | x | x | x | x | x     | x |
| 12-2274  | Typhimurium | 7  | 28 |       |       |           |   |   | x | x | x | x | x     | x |
| 12-3216  | Typhimurium | 7  | 27 |       |       |           |   |   | x | x | x | x | x     | x |
| 12-3405  | Typhimurium | 7  | 26 |       |       |           |   |   | x | x | x | x | x     | x |
| 12-3331  | Typhimurium | 7  | 23 |       |       |           |   |   | x | x | x | x | x     | x |
| 12-3215  | Typhimurium | 7  | 27 |       |       |           |   |   | x | x | x | x | x     | x |
| 12-2412  | Typhimurium | 7  | 26 |       |       |           |   |   | x | x | x | x | x     | x |
| 12-3161  | Typhimurium | 7  | 27 |       |       |           |   |   | x | x | x | x | x     | x |
| 12-3202  | Typhimurium | 7  | 30 |       |       |           |   |   | x | x | x | x | x     | x |

|                   |                                   |   |    |           |      |           |   |   |   |   |   |   |   |   |
|-------------------|-----------------------------------|---|----|-----------|------|-----------|---|---|---|---|---|---|---|---|
| <b>12-3443</b>    | Typhimurium                       | 7 | 24 |           |      |           |   |   | x | x | x | x | x | x |
| <b>12-3068</b>    | Typhimurium                       | 7 | 29 |           |      |           |   |   | x | x | x | x | x | x |
| <b>12-4613</b>    | Typhimurium                       | 7 | 29 | Asp87-Asn | /    | /         |   |   | x | x | x | x | x | x |
| <b>12-3486</b>    | Typhimurium                       | 7 | 28 | Asp87-Asn | /    | /         |   |   | x | x | x | x | x | x |
| <b>12-3579</b>    | Typhimurium                       | 7 | 29 | Asp87-Tyr | /    | /         |   |   | x | x | x | x | x | x |
| <b>12-3219</b>    | Typhimurium                       | 7 | 30 | Asp87-Asn | /    | /         |   |   | x | x | x | x | x | x |
| <b>S13BD01820</b> | TYPHIMURIUM                       | 7 | 27 | Asp87-Asn | /    | /         |   |   | x | x | x | x | x | x |
| <b>S13BD02846</b> | TYPHIMURIUM                       | 7 | 27 | Asp87-Tyr | /    | /         |   |   | x | x | x | x | x | x |
| <b>S13BD03382</b> | TYPHIMURIUM                       | 7 | 28 | Asp87-Asn | /    | /         |   |   | x | x | x | x | x | x |
| <b>S13BD03187</b> | TYPHIMURIUM                       | 7 | 29 | Asp87-Asn | /    | /         |   |   | x | x | x | x | x | x |
| <b>S13BD03710</b> | TYPHIMURIUM                       | 7 | 27 | Ser83-Tyr | /    | /         |   |   | x | x | x | x | x | x |
| <b>S13BD02987</b> | TYPHIMURIUM                       | 7 | 26 | Asp87-Asn | /    | /         |   |   | x | x | x | x | x | x |
| <b>S13BD02153</b> | TYPHIMURIUM                       | 7 | 28 |           |      |           |   |   | x | x | x | x | x | x |
| <b>S13BD02805</b> | TYPHIMURIUM                       | 7 | 28 |           |      |           |   |   | x | x | x | x | x | x |
| <b>S13BD00165</b> | TYPHIMURIUM                       | 7 | 28 |           |      |           |   |   | x | x | x | x | x | x |
| <b>S13BD03295</b> | TYPHIMURIUM                       | 7 | 29 |           |      |           |   |   | x | x | x | x | x | x |
| <b>S13BD00411</b> | TYPHIMURIUM                       | 7 | 29 |           |      |           |   |   | x | x | x | x | x | x |
| <b>S13BD02183</b> | TYPHIMURIUM                       | 7 | 28 |           |      |           |   |   | x | x | x | x | x | x |
| <b>S13BD02541</b> | TYPHIMURIUM                       | 7 | 25 |           |      |           |   |   | x | x | x | x | x | x |
| <b>S13BD02359</b> | TYPHIMURIUM                       | 7 | 24 |           |      |           |   |   | x | x | x | x | x | x |
| <b>S13BD01084</b> | TYPHIMURIUM                       | 7 | 28 |           |      |           |   |   | x | x | x | x | x | x |
| <b>S13BD03638</b> | TYPHIMURIUM                       | 7 | 25 |           |      |           |   |   | x | x | x | x | x | x |
| <b>S13BD00711</b> | TYPHIMURIUM                       | 7 | 24 |           |      |           |   |   | x | x | x | x | x | x |
| <b>S13BD03294</b> | TYPHIMURIUM                       | 7 | 29 |           |      |           |   |   | x | x | x | x | x | x |
| <b>S13BD03044</b> | TYPHIMURIUM                       | 7 | 30 |           |      |           |   |   | x | x | x | x | x | x |
| <b>12-3182</b>    | Typhimurium<br>[4,5:i:-]          | 7 | 28 |           |      |           |   |   | x | x | x | x | x | x |
| <b>11-2705</b>    | Typhimurium<br>var.<br>Copenhagen | 7 | 22 |           |      |           |   |   |   |   |   |   |   |   |
| <b>10-02095</b>   | Virchow                           | 7 | 23 | > 256     | 0.19 | Ser83-Phe | / | / | x | x | x | x | x | x |
| <b>10-02893</b>   | Virchow                           | 7 | 24 | > 256     | 0.19 | Ser83-Tyr | / | / | x | x | x | x | x | x |

|            |         |   |    |       |       |           |   |   |   |   |   |   |       |   |
|------------|---------|---|----|-------|-------|-----------|---|---|---|---|---|---|-------|---|
| 10-00448   | Virchow | 7 | 25 | > 256 | 0.19  | Asp87-Tyr | / | / | x | x | x | x | x     | x |
| 10-01033   | Virchow | 7 | 26 | > 256 | 0.094 | Asp87-Tyr | / | / | x | x | x | x | x     | x |
| 10-04354   | Virchow | 7 | 28 | > 256 | 0.094 | Asp87-Tyr | / | / | x | x | x | x | x     | x |
| 11-1308    | Virchow | 7 | 22 | >256  | 0.25  | Ser83-Phe | / | / | x | x | x | x | x     | x |
| 11-3606    | Virchow | 7 | 25 | >256  | 0.19  | Asp87-Tyr | / | / | x | x | x | x | x     | x |
| 11-2699    | Virchow | 7 | 26 | >256  | 0.125 | Asp87-Tyr | / | / | x | x | x | x | x     | x |
| 11-3060    | Virchow | 7 | 27 | >256  | 0.19  | Asp87-Tyr | / | / | x | x | x | x | x     | x |
| 09-00824   | Virchow | 7 | 26 |       |       |           |   |   |   |   |   |   |       |   |
| 09-00853   | Virchow | 7 | 25 |       |       |           |   |   |   |   |   |   |       |   |
| 09-01343   | Virchow | 7 | 26 |       |       | Asp87-Tyr | / | / | x | x | x | x | x     | x |
| 09-01416   | Virchow | 7 | 24 |       |       | /         | / | / | x | x | x | x | x     | x |
| 09-04304   | Virchow | 7 | 25 |       |       | Asp87-Tyr | / | / |   |   |   |   |       |   |
| 09-02002   | Virchow | 7 | 26 |       |       |           |   |   |   |   |   |   |       |   |
| 09-03580   | Virchow | 7 | 27 |       |       | Asp87-Tyr | / | / |   |   |   |   |       |   |
| 10-00329   | Virchow | 7 | 26 |       |       | Asp87-Tyr | / | / |   |   |   |   |       |   |
| 12-3542    | Virchow | 7 | 25 |       |       |           |   |   | x | x | x | x | x     | x |
| 12-3430    | Virchow | 7 | 27 |       |       |           |   |   | x | x | x | x | x     | x |
| 12-3120    | Virchow | 7 | 27 |       |       |           |   |   | x | x | x | x | x     | x |
| 12-0755    | Virchow | 7 | 25 |       |       |           |   |   | x | x | x | x | x     | x |
| 12-4260    | Virchow | 7 | 27 |       |       |           |   |   | x | x | x | x | x     | x |
| 12-0722    | Virchow | 7 | 29 |       |       |           |   |   | x | x | x | x | x     | x |
| S13BD01210 | VIRCHOW | 7 | 26 |       |       |           |   |   | x | x | x | x | x     | x |
| S13BD02234 | VIRCHOW | 7 | 27 |       |       | Asp87-Tyr | / | / | x | x | x | x | x     | x |
| S13BD00737 | VIRCHOW | 7 | 30 |       |       | Asp87-Tyr | / | / | x | x | x | x | x     | x |
| S13BD03661 | VIRCHOW | 7 | 28 |       |       | Asp87-Tyr | / | / | x | x | x | x | x     | x |
| S13BD03746 | VIRCHOW | 7 | 26 |       |       | Asp87-Tyr | / | / | x | x | x | x | x     | x |
| S13BD02666 | VIRCHOW | 7 | 27 |       |       |           |   |   | x | x | x | x | x     | x |
| S13BD03138 | VIRCHOW | 7 | 24 |       |       |           |   |   | x | x | x | x | QnrS2 | x |





**Table S5.** Resistance against third-generation cephalosporins.

| <b>Id</b> | <b>Serovar</b>                 | <b>Amp</b> | <b>Ac</b> | <b>Ct</b> | <b>Cx</b> | <b>CCT</b> | <b>Fox</b> | <b>FEP</b> | <b>FEP<br/>+C</b> | <b>CAZ</b> | <b>CAZ+<br/>C</b> | <b>MEM</b> | <b>IMI</b> | <b>IMI<br/>+E</b> |
|-----------|--------------------------------|------------|-----------|-----------|-----------|------------|------------|------------|-------------------|------------|-------------------|------------|------------|-------------------|
| 09-01903  | Enteritidis                    | 7          | 23        | ND        | 11        | 31         | 29         | 20         | 34                | 25         | 32                | 35         | 34         | 34                |
| 09-00178  | Paratyphi B                    | 7          | 17        | ND        | 7         | 31         | 28         | 12         | 32                | 19         | 32                | 34         | 36         | 35                |
| 09-00179  | Paratyphi B                    | 7          | 18        | ND        | 7         | 31         | 29         | 12         | 32                | 19         | 30                | 35         | 34         | 34                |
| 09-00832  | Paratyphi B                    | 7          | 17        | ND        | 7         | 28         | 28         | 11         | 31                | 19         | 28                | 34         | 36         | 36                |
| 09-02327  | Paratyphi B                    | 7          | 14        | ND        | 7         | ND         | ND         | ND         | ND                | ND         | ND                | ND         | ND         | ND                |
| 09-00775  | Paratyphi B                    | 7          | 21        | ND        | 10        | ND         | ND         | ND         | ND                | ND         | ND                | ND         | ND         | ND                |
| 09-04214  | Paratyphi B                    | 7          | 23        | ND        | 12        | ND         | ND         | ND         | ND                | ND         | ND                | ND         | ND         | ND                |
| 09-04182  | Paratyphi B                    | 7          | 23        | ND        | 13        | ND         | ND         | ND         | ND                | ND         | ND                | ND         | ND         | ND                |
| 09-04224  | Paratyphi B                    | 7          | 23        | ND        | 13        | ND         | ND         | ND         | ND                | ND         | ND                | ND         | ND         | ND                |
| 09-02080  | Paratyphi B                    | 7          | 22        | ND        | 15        | 33         | 28         | 23         | 33                | 14         | 30                | 33         | 32         | 33                |
| 09-01327  | Paratyphi B                    | 7          | 7         | ND        | 17        | 24         | 20         | 34         | 34                | 13         | 26                | 34         | 35         | 35                |
| 09-02281  | Paratyphi B                    | 16         | 22        | ND        | 18        | 32         | 31         | 26         | 36                | 17         | 32                | 34         | 34         | 33                |
| 09-03124  | Typhimurium                    | 7          | 22        | ND        | 8         | 31         | 29         | 20         | 34                | 24         | 29                | 33         | 34         | 35                |
| 09-02882  | Typhimurium                    | 7          | 21        | ND        | 11        | ND         | ND         | ND         | ND                | ND         | ND                | ND         | ND         | ND                |
| 09-02767  | Typhimurium                    | 7          | 20        | ND        | 12        | 31         | 29         | 20         | 35                | 23         | 31                | 35         | 35         | 35                |
| 09-02924  | Typhimurium                    | 7          | 22        | ND        | 12        | ND         | ND         | ND         | ND                | ND         | ND                | ND         | ND         | ND                |
| 09-02533  | Typhimurium var.<br>Copenhagen | 7          | 20        | ND        | 12        | 30         | 26         | 14         | 31                | 21         | 27                | 32         | 29         | 30                |
| 10-05018  | Typhimurium                    | 7          | 21        | ND        | 10        | 31         | 27         | 15         | 31                | 19         | 26                | 33         | 31         | 31                |
| 10-00073  | Enteritidis                    | 7          | 24        | ND        | 12        | 32         | 26         | 17         | 32                | 21         | 31                | 34         | 35         | 35                |
| 10-00013  | Paratyphi B                    | 7          | 22        | ND        | 13        | ND         | ND         | ND         | ND                | ND         | ND                | ND         | ND         | ND                |
| 10-00285  | Paratyphi B                    | 7          | 22        | ND        | 13        | ND         | ND         | ND         | ND                | ND         | ND                | ND         | ND         | ND                |
| 10-02076  | Typhimurium                    | 7          | 7         | ND        | 13        | ND         | ND         | ND         | ND                | ND         | ND                | ND         | ND         | ND                |
| 10-02873  | Infantis                       | 7          | 22        | ND        | 14        | ND         | ND         | ND         | ND                | ND         | ND                | ND         | ND         | ND                |
| 10-04387  | Infantis                       | 7          | 23        | ND        | 15        | ND         | ND         | ND         | ND                | ND         | ND                | ND         | ND         | ND                |
| 10-02095  | Virchow                        | 7          | 23        | ND        | 16        | ND         | ND         | ND         | ND                | ND         | ND                | ND         | ND         | ND                |
| 10-05307  | Derby                          | 13         | 17        | ND        | 19        | 32         | 25         | 32         | 32                | 25         | 27                | 33         | 28         | 27                |
| 11-2885   | Agona                          | 7          | 15        | 7         | ND        | ND         | ND         | ND         | ND                | ND         | ND                | ND         | ND         | ND                |
| 11-3672   | Concord                        | 7          | 20        | ND        | 7         | 32         | 26         | 12         | 33                | 9          | 28                | 34         | 31         | 31                |
| 11-1704   | Concord                        | 7          | 20        | ND        | 7         | ND         | ND         | ND         | ND                | ND         | ND                | ND         | ND         | ND                |
| 11-1692   | Concord                        | 7          | 19        | ND        | 7         | ND         | ND         | ND         | ND                | ND         | ND                | ND         | ND         | ND                |
| 11-0165   | Concord                        | 7          | 18        | ND        | 7         | ND         | ND         | ND         | ND                | ND         | ND                | ND         | ND         | ND                |
| 11-3705   | Enteritidis                    | 7          | 20        | ND        | 7         | ND         | ND         | ND         | ND                | ND         | ND                | ND         | ND         | ND                |
| 11-4075   | Enteritidis                    | 7          | 7         | ND        | 7         | ND         | ND         | ND         | ND                | ND         | ND                | ND         | ND         | ND                |
| 11-4200   | Enteritidis                    | 7          | 7         | ND        | 7         | 34         | 27         | 31         | 32                | 27         | 33                | 34         | 32         | 33                |

|                   |                                             |    |    |    |    |    |    |    |    |    |    |    |    |    |
|-------------------|---------------------------------------------|----|----|----|----|----|----|----|----|----|----|----|----|----|
| <b>11-3774</b>    | Enteritidis                                 | 7  | 7  | ND | 7  | ND |
| <b>11-4366</b>    | Kentucky                                    | 7  | 12 | ND | 7  | 30 | 25 | 28 | 33 | 25 | 29 | 34 | 29 | 30 |
| <b>11-2754</b>    | Kentucky                                    | 7  | 13 | ND | 10 | ND |
| <b>11-4306</b>    | Typhimurium                                 | 7  | 21 | ND | 11 | 29 | 28 | 17 | 36 | 20 | 31 | 34 | 33 | 34 |
| <b>11-0827</b>    | Derby                                       | 7  | 7  | ND | 12 | 13 | 7  | 26 | 29 | 9  | 17 | 34 | 28 | 28 |
| <b>11-2915</b>    | Kentucky                                    | 7  | 7  | ND | 13 | 16 | 11 | 28 | 33 | 10 | 17 | 35 | 26 | 26 |
| <b>11-3991</b>    | Kentucky                                    | 7  | 7  | ND | 17 |    |    |    |    |    |    |    |    |    |
| <b>11-3059</b>    | Typhimurium                                 | 7  | 19 | ND | 17 | 32 | 29 | 26 | 33 | 14 | 32 | 32 | 32 | 32 |
| <b>11-1464</b>    | Typhimurium                                 | 7  | 15 | ND | 17 |    |    |    |    |    |    |    |    |    |
| <b>12-3591</b>    | Infantis                                    | 7  | 27 | 7  | ND | 31 | 27 | 19 | 31 | 24 | 32 | 33 | 35 | 34 |
| <b>12-4502</b>    | Infantis                                    | 7  | 26 | 7  | ND | 32 | 27 | 24 | 32 | 23 | 29 | 35 | 31 | 32 |
| <b>12-3730</b>    | Infantis                                    | 7  | 23 | 7  | ND | 29 | 27 | 16 | 32 | 20 | 28 | 34 | 32 | 33 |
| <b>12-3542</b>    | Virchow                                     | 7  | 22 | 7  | 7  | 32 | 29 | 22 | 34 | 16 | 30 | 35 | 30 | 31 |
| <b>12-0401</b>    | Concord                                     | 7  | 21 | ND | 7  | 30 | 26 | 11 | 32 | 9  | 27 | 36 | 32 | 33 |
| <b>12-0696</b>    | Concord                                     | 7  | 21 | ND | 7  | 31 | 24 | 11 | 32 | 9  | 29 | 35 | 30 | 30 |
| <b>12-0697</b>    | Concord                                     | 7  | 21 | ND | 7  | 31 | 28 | 12 | 35 | 9  | 29 | 36 | 31 | 31 |
| <b>12-3301</b>    | Concord                                     | 7  | 14 | ND | 7  | 30 | 26 | 14 | 34 | 9  | 33 | 35 | 34 | 34 |
| <b>12-1288</b>    | Enteritidis                                 | 7  | 25 | ND | 7  | 32 | 30 | 10 | 36 | 11 | 31 | 36 | 31 | 32 |
| <b>12-2376</b>    | Enteritidis                                 | 7  | 11 | ND | 12 | 33 | 28 | 34 | 34 | 30 | 31 | 35 | 32 | 32 |
| <b>12-1493</b>    | Enteritidis                                 | 7  | 7  | ND | 13 | ND |
| <b>12-1831</b>    | Enteritidis                                 | 7  | 22 | ND | 14 | 32 | 27 | 31 | 32 | 29 | 30 | 34 | 28 | 28 |
| <b>12-2748</b>    | Typhimurium                                 | 7  | 22 | ND | 15 | 30 | 26 | 28 | 28 | 22 | 25 | 31 | 21 | 27 |
| <b>S13BD03130</b> | DUBLIN                                      | 25 | 26 | 7  | ND |    |    |    |    |    |    |    |    |    |
| <b>S13BD03795</b> | INFANTIS                                    | 7  | 22 | 7  | ND | 32 | 27 | 24 | 34 | 24 | 31 | 35 | 33 | 33 |
| <b>S13BD03471</b> | MONOPHASIC<br>TYPHIMURIUM<br>1.4.[5].12:I:- | 7  | 20 | 7  | ND | 31 | 30 | 20 | 35 | 23 | 30 | 36 | 32 | 32 |
| <b>S13BD01820</b> | TYPHIMURIUM                                 | 7  | 15 | 7  | ND | 32 | 30 | 16 | 33 | 22 | 31 | 37 | 33 | 34 |
| <b>S13BD01263</b> | INFANTIS                                    | 7  | 21 | 10 | ND | 32 | 27 | 24 | 32 | 23 | 30 | 36 | 31 | 32 |
| <b>S13BD03628</b> | INFANTIS                                    | 7  | 25 | 11 | ND | 32 | 28 | 23 | 34 | 23 | 28 | 34 | 31 | 30 |
| <b>S13BD02584</b> | INFANTIS                                    | 7  | 25 | 12 | ND | 31 | 26 | 24 | 34 | 23 | 31 | 34 | 34 | 34 |
| <b>S13BD02611</b> | KENTUCKY                                    | 7  | 7  | 12 | ND | 13 | 9  | 29 | 29 | 12 | 14 | 34 | 29 | 29 |
| <b>S13BD01681</b> | NEWPORT                                     | 7  | 7  | 13 | ND | 15 | 11 | 31 | 33 | 13 | 19 | 36 | 28 | 28 |
| <b>S13BD02836</b> | TYPHIMURIUM                                 | 7  | 21 | 13 | ND | 31 | 25 | 21 | 32 | 11 | 22 | 34 | 31 | 29 |
| <b>S13BD03778</b> | INFANTIS                                    | 7  | 8  | 15 | ND | 20 | 11 | 31 | 31 | 13 | 20 | 36 | 30 | 30 |
| <b>S13BD03298</b> | TYPHIMURIUM                                 | 7  | 22 | 16 | ND | 32 | 30 | 22 | 34 | 26 | 30 | 35 | 30 | 31 |
| <b>S13BD02692</b> | TYPHIMURIUM                                 | 7  | 11 | 16 | ND | 24 | 20 | 30 | 25 | 18 | 21 | 35 | 33 | 34 |

|                   |             |   |    |    |    |    |    |    |    |    |    |    |    |    |
|-------------------|-------------|---|----|----|----|----|----|----|----|----|----|----|----|----|
| <b>S13BD02842</b> | TYPHIMURIUM | 7 | 21 | 16 | ND | 32 | 28 | 23 | 35 | 27 | 31 | 35 | 32 | 32 |
| <b>S13BD02824</b> | TYPHIMURIUM | 7 | 25 | 16 | ND | 32 | 29 | 25 | 34 | 28 | 31 | 35 | 31 | 32 |
| <b>S13BD02810</b> | TYPHIMURIUM | 7 | 24 | 17 | ND | 32 | 29 | 26 | 34 | 26 | 30 | 34 | 30 | 30 |
| <b>S13BD02386</b> | TYPHIMURIUM | 7 | 24 | 18 |    | 32 | 28 | 25 | 35 | 25 | 30 | 35 | 33 | 33 |

Abbreviations:

FEP30, Cefepime 30 µg (+/-10 µg calvulanic acid; CCT, cefotaxime 30µg + clavulanic acid; CTX, cefotaxime 30 µg; FOX, Cefoxitin 30 µg, CAZ, ceftazidime (+10 µg clavulanic acid); IMI, imipenem (+750 µg EDTA); MEM, meropenem; ND, not determined.
